# The single *Marchantia polymorpha* *FERONIA* homolog reveals an ancestral role in regulating cellular expansion and integrity

Martin A. Mecchia<sup>1,‡</sup>, Moritz Rövekamp<sup>1,‡,§</sup>, Alejandro Giraldo-Fonseca<sup>1</sup>, Dario Meier<sup>1</sup>, Philippe Gadiant<sup>1</sup>, Hannes Vogler<sup>1</sup>, Daria Limacher<sup>1</sup>, John L. Bowman<sup>2</sup>, and Ueli Grossniklaus<sup>1,\*</sup>

<sup>1</sup>Department of Plant and Microbial Biology and Zurich-Basel Plant Science Center, University of Zurich, 8008 Zurich, Switzerland

<sup>2</sup>School of Biological Sciences, Monash University, Clayton, Melbourne, Victoria 3800, Australia

\*Author for correspondence: grossnik@botinst.uzh.ch

‡These authors contributed equally to the manuscript.

§Present address: Kantonsschule Uetikon am See, 8708 Uetikon am See, Switzerland

## Summary statement

The *CrRLK1L* family arose in land plants and the *Marchantia polymorpha* genome contains a single copy, *MpFER*, which is broadly expressed and regulates cell expansion and cell wall integrity.

## Abstract

Plant cells are surrounded by a cell wall, a rigid structure that is not only important for cell and organ shape, but crucial for intercellular communication and interactions with the environment. In the flowering plant *Arabidopsis thaliana*, the 17 members of the *Catharanthus roseus* RLK1-like (*CrRLK1L*) receptor kinase family are involved in a multitude of physiological and developmental processes, making it difficult to assess their primary or ancestral function. To reduce genetic complexity, we characterized the single *CrRLK1L* gene of *Marchantia polymorpha*, *MpFERONIA* (*MpFER*). Plants with

reduced Mp*FER* levels show defects in vegetative development, i.e., rhizoid formation and cell expansion, and have reduced male fertility. In contrast, Mp*fer* null mutants and overexpression lines severely affect cell integrity and morphogenesis of the gametophyte. Thus, the CrRLK1L gene family originated from a single gene with an ancestral function in cell expansion and the maintenance of cellular integrity. During land plant evolution, this ancestral gene diversified to fulfil a multitude of specialized physiological and developmental roles in the formation of both gametophytic and sporophytic structures essential to the life cycle of flowering plants.

**Key Words:** cell wall integrity, cell elongation, CrRLK1L receptor kinases, *Marchantia polymorpha*, signaling pathway evolution

## Introduction

The functioning of plant cells is contingent upon the cell wall acting as a barrier between the cell and its environment. This complex matrix of polysaccharides, glycoproteins, and other organic compounds defines the growth and shape of a cell and provides protection against biotic and abiotic stresses [1], [2], [3]. Moreover, the cell wall has to resist turgor pressure while also allowing cell expansion during growth. Thus, sensing and controlling cell wall integrity (CWI) is crucial for plant cells, and receptor kinases (RKs) play an important role in sensing extracellular cues that activate intracellular pathways. Different RK subfamilies are defined by their extracellular domain (ECD), which is more variable than their transmembrane and kinase domains [4]. Over the last decade, the CrRLK1L subfamily emerged as important CWI sensors [5], [6].

Functions have been assigned to 15 of the 17 CrRLK1L members encoded in the *A. thaliana* genome: they are required for sensing environmental cues and cell-cell communication in diverse contexts, including reproduction, hormone signaling, cell expansion, innate immunity, and various stress responses [7]–[23]. For instance, *FERONIA* (At*FER*), *THESEUS1* (At*THE1*), *HERCULES1* (At*HERK1*), and At*HERK2* are required for cell elongation as At*fer* single, At*the1Atherk1* double, and At*the1Atherk1Atherk2* triple mutants exhibit stunted growth [8], [10]–[12]. Root hairs burst in mutants affecting At*FER* and *[Ca<sup>2+</sup>]<sub>cyt</sub>-ASSOCIATED PROTEIN KINASE1*

(AtCAP1)/ERULUS (AtERU) [13], [17]. Moreover, AtFER plays a role in powdery mildew resistance [12], innate immunity [16], [23], calcium signaling [24], phytohormone signaling [11], [25]–[27], and mechano- and heavy metal sensing [21], [28]. In most contexts, the CrRLK1Ls tend to promote cellular growth and cell elongation. In contrast, AtTHE1 actively inhibits cell elongation in hypocotyls when cell wall perturbations occur, e.g., due to mutations in the cell wall biosynthesis machinery or upon treatment with isoxaben, a cellulose synthesis inhibitor [8], [29].

In addition to regulating cellular growth during the vegetative phase of the life cycle, several CrRLK1Ls play a role during fertilization by controlling the growth and reception of the pollen tube. In the female gametophyte, AtFER is highly expressed in the two synergid cells that flank the egg cell and are important for double fertilization [7], [30]. AtFER is crucial for pollen tube reception and the release of the two sperm cells [7], [11], [24], [31], [32], a process also involving two other, redundantly acting synergid-expressed CrRLK1Ls, AtHERK1 and ANJEA (AtANJ) [18]. Moreover, AtFER and AtANJ also play a role in pollen-stigma recognition during pollen germination [1]. In contrast to these synergid-expressed CrRLK1Ls, four pollen-expressed CrRLK1Ls, named ANXUR1 (AtANX1), AtANX2, BUDDHA'S PAPER SEAL 1 (AtBUPS1) and AtBUPS2 [9], [15], [19], [33], are redundantly required for pollen tube integrity and tip growth.

To transduce extracellular cues, CrRLK1Ls bind secreted peptides of the RAPID ALKALINIZATION FACTOR (RALF) family [23], [33]–[36], which induce complex formation with members of LORELEI (LRE) family of GPI-anchored proteins [33], [36]–[38]. Hence, it was suggested that at least some CrRLK1Ls act as CWI sensors that coordinate cell elongation in response to changes in the cell wall [39]–[44]. A role as CWI sensors is also consistent with recent findings that AtFER interacts with pectin [43], [45], [46].

The 17 *A. thaliana* CrRLK1Ls act partially redundantly and sometimes even have opposite effects on cellular growth (reviewed in [20], [42], [44], [47]). To investigate the original function of CrRLK1Ls, we characterized them in a system with reduced genetic complexity: the liverwort *Marchantia polymorpha* encodes a single CrRLK1L [48], [49]. Liverworts represent an early diverging land plant lineage and have been hypothesized to retain, at least in part, characteristics of the earliest land plants [48], [50]–[55]. The presence of similar types of gene families in all plant lineages suggests that the differences in development evolved by co-opting and modifying existing developmental

programs and genetic networks, rather than through the evolution of novel genes [50], [51], [56]. *M. polymorpha* is thus an ideal system to study the ancestral role of genes and how it was modulated and diversified during land plant evolution [48], [57], [58].

We refer to the single CrRLK1L encoded in the *M. polymorpha* genome, Mp4g15890 (Mapoly0869s0001), as MpFERONIA (MpFER) [47]–[49] (aka MpTHESEUS, MpTHE) [59]. An Mpfer/the mutant was identified in a large T-DNA screen for defective rhizoid formation, developing short and irregularly shaped rhizoids with brown tips, indicating rhizoid rupture [59]. In the same screen, a mutant affecting the ortholog of the *A. thaliana* receptor-like cytoplasmic kinase MARIS (AtMRI), known to act downstream of AtFER, was identified with a similar phenotype (named Mpmri aka Mppti, Mp7g17560 [Mapoly0051s0094]) [59], [60]. As in *A. thaliana*, a dominant active version of MpMRI can partially rescue the Mpfer rhizoid phenotype [60]. This suggests that at least some of the machinery associated with cell elongation and CWI sensing is conserved between *A. thaliana* and *M. polymorpha*.

Here, we report that MpFER function is required for a variety of aspects of *M. polymorpha* gametophyte development. Phylogenetic analyses suggest that CrRLK1L genes first appeared in the common ancestor of land plants. The characterization of lines with reduced MpFER levels indicates that, in addition to its function in rhizoid formation, MpFER controls cell size and organ growth and is involved in male gametogenesis and fertility. Analysis of the MpFER expression pattern points to an involvement in female sexual organogenesis and sporophyte development. Our data suggests that the broad involvement of CrRLK1L function in the development and physiology of land plants is an ancestral and conserved characteristic, although the functions of CrRLK1Ls were extended and adapted to control additional developmental processes in the sporophyte during the course of land plant evolution.

## Results

### CrRLK1L is conserved in land plants and arose in this lineage

The *M. polymorpha* genome encodes a single CrRLK1L homolog (Mp4g15890 [Mapoly0869s0001]) [47]–[49]. Like other CrRLK1L members, this gene encodes an intracellular serine/threonine kinase domain, a transmembrane domain, and an extracellular malectin-like domain with two malectin domains (Fig. 1A). Given that the ECD of CrRLK1Ls in *A. thaliana* is crucial for their function and, in contrast to the kinase

domain, not interchangeable [61], we performed a phylogenetic analysis with the amino acid sequences of the predicted malectin-like domain of Mp4g15890, the CrRLK1Ls of the mosses *Physcomitrium patens* (5 members), *Sphagnum fallax* (7 members), *Ceratodon purpureus* (3 members), the hornworts *Anthoceros agrestis* Bonn (one member), *Anthoceros agrestis* Oxford (one member), *Anthoceros punctatus* (one member), the lycophyte *Selaginella moellendorffii* (two members), the basal angiosperm *Amborella trichopoda* (nine members), and the 17 CrRLK1Ls of *A. thaliana* (Fig. 1B). The *M. polymorpha* CrRLK1L member grouped together with the CrRLK1Ls of basal land plants and was in the same clade as, e.g., AtFER, AtHERK2, and AtANX1/2, while AtTHE1 was in a different one (Fig. 1B). Based on this phylogenetic position and the fact that the malectin-like domain of the *M. polymorpha* CrRLK1L shared the highest amino acid identity with AtFER (Fig. S1A), we named it MpFER [48], [49], [60].

Interestingly, no significant similarity to the MpFER malectin-like domain was found when compared to available genomic data of six Chlorophyte algae (*Chlamydomonas reinhardtii*, *Dunaliella salina*, *Volvox carteri*, *Coccomyxa subellipsoidea*, *Micromonas pusilla*, *Ostreococcus lucimarinus*) and expression data of six Charophycean algae (*Klebsormidium nitens*, *Nitella mirabilis*, *Coleochaete orbicularis*, *Spirogyra pratensis*, *Mesostigma viride*, *Closterium peracerosum–strigosum–littorale* complex). In *Closterium* complex, an RK named CpRLK1 expressed during sexual reproduction was suggested to be a CrRLK1L homolog [62]. However, comparing the full sequence or the ECD of CpRLK1 with the predicted *M. polymorpha* proteome, higher identity to another RK was found (Mp1g17720 [Mapoly0001s0111]) (Figs S1B,C). Moreover, no RALF orthologs have been reported in algae, suggesting the origin of the CrRLK1L pathway in land plants [48]. A similar conclusion was recently reached by analyzing the RALF family in *P. patens* [63]. Moreover, the best candidate obtained by BLAST analysis using the MpFER malectin-like domain against the genome of the Charophycean alga *Chara braunii* clustered outside the CrRLK1L phylogenetic tree (Figs. 1B, S1B).

To further support MpFER as a member of the CrRLK1L subfamily, the three-dimensional structure of its ECD was modelled [64] using the structure of the AtFER ECD (PDB 6a5b.1A, [36]) as a template (Fig. 1C). Overall, the predicted structure of the MpFER ECD is highly similar to that of AtFER, keeping an almost identical number of secondary structures (7 alpha-helices and 33 beta-sheets in the MpFER ECD [36] and 8 alpha-helix and 34 beta-sheets in the AtFER ECD, respectively), and a similar spatial

disposition for 32 of the beta-sheet structures and 6 of the alpha-helices (Fig. 1C). When comparing the structural superposition of the AtFER and MpFER ECDs (Figs. 1D and S1D), we observed that most conserved parts of the malectin-like domain are in the core of the protein, while the more variable parts are located peripherally. Moreover, the 3D structure of the CrRLK1 ECD could not be properly modelled using the AtFER ECD (Fig. S1D,E), neither the one from *C. braunii* (Fig. S1D,F). Taken together, these results suggest that the malectin-like domain of MpFER could interact with similar proteins as AtFER does in *A. thaliana* and may thus be involved in similar pathways. Sequence comparison of the MpFER kinase domain showed a conservation of the activation loop and a Lys important for catalytic activity (Fig. 1E). Furthermore, several determined phosphorylation sites found in AtFER, AtERU, and CrRLK1 were conserved in MpFER (Fig. 1E) [14], [34], [65], [66]. Given that the genomes of *M. polymorpha* and *Anthoceros* spp. encode a single CrRLK1L and this RK family is not present in Charophycean algae, we propose MpFER to be basal and orthologous to all other land plant CrRLK1Ls, and that the CrRLK1L family arose as plants conquered land.

### **MpFER is broadly expressed throughout the *M. polymorpha* life cycle**

In *A. thaliana*, the expression patterns of the 17 CrRLK1L members span vegetative and reproductive stages and both generations of the life cycle (reviewed in [44]), pointing to the importance of CrRLK1Ls for basic cellular functions. To assess whether this pattern is reflected in the land plant with the most ancestral characteristics, a promoter fragment of 3.2 kb (*proMpFER*) was used to drive expression of a triple yellow fluorescent protein (trpVNS) with a nuclear localization signal (*proMpFER:trpVNS*) and transformed into *M. polymorpha* sporelings. All transformants expressing the trpVNS fluorescent protein (45 of 48 independent lines) exhibited an indistinguishable expression pattern (Fig. 2). During vegetative stages of gametophyte development, expression was observed in most cells of the thallus (Fig. 2A). In concordance with the importance of MpFER for rhizoids [59], high trpVNS expression was observed in these tip-growing cells (Fig. 2B). While trpVNS was expressed in gemma cups, no expression was observed in mature gemmae, possibly due to their dormancy (Fig. 2C).

In mature female sexual organs, strong expression was observed in the entire archegoniophore (Fig. 2D). The archegonia expressed trpVNS in most cells, except for the egg cell (Fig. 2E). However, after fertilization, *proMpFER:trpVNS* became active in



the zygote (Fig. 2F). In male sexual organs, *trpVNS* was broadly detected in the antheridial splash platform (Fig. 2G) and, specifically, in the spermatogenous tissue of the antheridia and the non-reproductive jacket cells surrounding them at different developmental stages (Fig. 2H). Inside the sporogonium, the sporogenous cells and subsequently the developing spores, but not the elater cells, strongly expressed *trpVNS* (Fig. 2I).

Taken together, *MpFER* is expressed in most tissues during vegetative stages of gametophyte development as well as in the antheridia and archegonia during the sexual reproduction. Interestingly, the *proMpFER* promoter is not active in mature gemmae and the unfertilized, quiescent egg cell, although expression is initiated after dormancy and in the zygote. In concordance with the collectively ubiquitous expression of *CrRLK1Ls* in *A. thaliana*, the *MpFER* expression pattern reinforces the importance of this family for basic cellular functions in land plants.

### ***MpFER* controls cell expansion during vegetative gametophyte development**

To analyze the function of *MpFER*, three independent artificial microRNA constructs targeting *MpFER* were designed (*amiR-MpFER*), based on the endogenous microRNA *MpmiR160* (Fig. S2, [67]) and driven by the ubiquitous *proMpEF1* promoter [68]. While *amiR-MpFER1* and *amiR-MpFER2* target sites in the ECD coding sequence, *amiR-MpFER3* targets the sequence encoding the kinase domain (Fig. 3A,B). For each *amiR-MpFER* construct, several independent transgenic lines were obtained that showed a reduction in thallus size (Figs. 3C,D and S3A). *MpFER* levels were quantified by qRT-PCR in two independent *amiR-MpFER2* and *amiR-MpFER3* lines each, which showed a similar phenotype (Fig. 3E). *MpFER* expression ranged from 10% to 20% of the wild-type level in all *amiR-MpFER* lines analyzed (Fig. 3E).

Previously, the T-DNA insertion mutant *Mpfer-1* was identified in a screen for mutants with defective rhizoids ([59], referred to as *Mpthe*). As the T-DNA inserted into the 3' UTR of the *MpFER* gene (Fig. 3A; [59]), *MpFER* expression was analyzed by qRT-PCR but it showed no reduction compared to the wild type (Fig. S3B), suggesting that the T-DNA insertion does not affect *MpFER* transcription. Sequencing of the *MpFER* coding sequence in the *Mpfer-1* mutant did not show any mutation, while 3' RACE-PCR showed that transcript terminated about 1.3 kb inside the T-DNA and was not polyadenylated (Fig. S3C). Because thallus size of *Mpfer-1* mutants is similar to that of

amiR-Mp*FER* lines (Figs. 3C,D and S3A) and efficient translation depends on the presence of a poly(A)-tail [69], we propose that Mp*FER* protein levels are reduced in the Mp*fer-1* mutant despite normal transcript levels.

Rhizoids are tip-growing cells analogous to the root hairs in flowering plants (angiosperms). Reduced Mp*FER* activity strongly impaired rhizoid formation and the rhizoids collapsed (Fig. S3D). This had also been reported for the Mp*fer-1* mutant [59] and is in concordance with the function of At*FER* and At*ANX1/2* in tip-growing root hairs [13], [17], [34], [70] and pollen tubes [9], [15], respectively. As CrRLK1L members are important for cell expansion in angiosperms [8], [10], [12], [20], [35], [71], [72], cell size of epidermal thallus cells in fully differentiated regions with minimal growth was measured in Mp*fer-1* and amiR-Mp*FER* lines, showing a reduction in cell area as compared to the wild type (Figs. 3F and S3E,F). The average epidermal cell area was similarly reduced, although the distribution of cell areas differed between amiR-Mp*FER* lines and Mp*fer-1* (Figs. 3F and S3E,F).

In conclusion, Mp*FER* has a fundamental role in rhizoid formation and growth during vegetative development. These results suggest an ancestral and conserved function of the CrRLK1Ls in polar cell growth and cell expansion.

### **Mp*FER* is important for the morphological integrity of the gametophyte**

Given that Mp*fer-1* and amiR-Mp*FER* lines retain some Mp*FER* activity, we generated Mp*fer* knock-out mutants with the goal to unveil potentially hidden CrRLK1L functions by generating a plant without any CrRLK1L activity. Using CRISPR/Cas9, two sites in the ECD-coding sequence of Mp*FER* were targeted (Fig. 4A,B). At least 10 independent lines were selected and analyzed for each target site. All plants with severely affected thallus development contained a frame shift mutation at the respective target site (Fig. 4B,C) while Mp*FER* was not affected in transgenic plants with normal development.

The thallus area of the newly generated, amorphic knock-out mutants was more strongly reduced compared to Mp*fer-1* [59], confirming that, like the amiR-Mp*FER* lines, Mp*fer-1* is a hypomorphic mutant (Fig. 4C,D). In contrast, rhizoid integrity was similarly affected in hypo- and amorphic Mp*fer* alleles, suggesting that rhizoid formation is more sensitive to reduced Mp*FER* activity than thallus growth (Fig. 4E,F). Despite of the strong impact on thallus development, both hypo- and amorphic Mp*fer* mutants form gemma cups.



The strong disruption of thallus growth in amorphic *Mpfer* mutants prompted us to investigate whether cells of the thallus died in the absence of *MpFER* activity. Indeed, using trypan blue staining, we detected dead cells in these mutants, indicating a loss of morphological integrity (Fig. 4G). To investigate the mechanical properties of thallus cells, we measured their apparent stiffness using cellular force microscopy on 3-day old gemmalings and found that amorphic *Mpfer-2* mutants had a lower apparent stiffness than the wild type (Fig. 4H). The apparent stiffness of the thalli depends on both the stiffness of the cell wall and the turgor pressure of the cells. Since the apparent stiffness is lower in *Mpfer-2* mutants, it is likely that a reduction in the stiffness their cell wall causes the cells to burst and die.

### **Some reproductive but not all CWI sensing functions of *CrRLK1Ls* are conserved in land plants**

In *A. thaliana*, at least seven *CrRLK1L* family members play a role in reproduction, with *AtANX1/2* and *AtBUPS1/2* being important for pollen tube growth [9], [15], [19], [33] and *AtFER*, *AtHERK1*, and *AtANJ* for pollen tube reception by the synergid cells [7], [18]. To characterize the function of *MpFER* in reproductive development, amiR-*MpFER3* lines were transferred to sexual organ-inducing conditions [73]. The number of antheridiophores produced was significantly less in amiR-*MpFER* lines compared to the wild type (Figs. 5A and S3G) and the antheridiophore splash platforms were also smaller (Fig. 5B). The reduction in *MpFER* expression in antheridiophores of amiR-*MpFER* lines was confirmed by qRT-PCR and results were comparable to those using thallus tissue (Fig. 5C). A pronounced reduction in spermatogenous tissue was observed in many antheridia isolated from amiR-*MpFER3-3* lines (Fig. 5D,E). Whether this phenotype is caused by reduced cell expansion as was observed in thalli or by a lower cell division rate is currently unclear. Moreover, although the plants were grown under optimal conditions in axenic culture boxes, the effects on reproductive structures could be partly indirect due to the reduction in plant size and/or rhizoid function.

To determine male fertility of these amiR-*MpFER* lines with reduced spermatogenous tissue, we performed crosses with wild-type female plants. The spermatocyte concentration harvested from wild-type antheridia was almost 3-fold higher than from amiR-*MpFER* lines and was adjusted using a hemocytometer. In just one of the crosses ( $n=20$ ), a single sporophyte was formed, resulting in  $0.05 \pm 0.05$  (mean  $\pm$  SE)

sporophytes per archegoniophore, whereas the same females crossed with wild-type males yielded  $9.95 \pm 2.33$  (mean  $\pm$  SE) sporophytes per archegoniophore. In summary, MpFER plays a role in antheridiophore development and spermatocytes of plants with reduced MpFER activity are poorly fertile. Thus, CrRLK1Ls have a conserved role in reproduction in addition to their role in cell expansion and integrity during vegetative development.

Some *A. thaliana* CrRLK1Ls are involved in surveying CWI and in inhibiting growth when CWI is impaired. Cell wall defects caused either by mutations affecting cellulose biosynthesis or by treatment with isoxaben, a cellulose synthesis inhibitor, can be suppressed by a mutation in *AtTHE1* [8], [29]. To investigate whether MpFER also acts as CWI sensor, we treated wild-type, *Mpfer-1*, and *Mpfer-2* gemmae with isoxaben (Fig. 5F,G). As in the wild type, isoxaben affected the development of gemmae with reduced MpFER activity, all growing progressively less with increasing isoxaben concentration (Fig. 5F,G). Moreover, isoxaben treatment was lethal for *Mpfer-2* knock out mutants (Fig. 5F,G). Similar observations were reported for *Atfer-4*, where isoxaben treatment increased the number of dead cells in hypocotyls [74]. These results suggest that the function of *AtTHE1* in repressing cellular growth when CWI is impaired appeared later in the course of land plant evolution or was lost in the *Marchantia* lineage.

### **The CrRLK1L signaling pathway is conserved in land plants**

As downregulation of MpFER or AtFER produce similar phenotypes concerning polarized growth and cell expansion in *M. polymorpha* and *A. thaliana*, respectively, interspecific complementation was attempted. First, the coding sequence of MpFER fused to the Green Fluorescent Protein (GFP) gene under the control of the viral 35S promoter (*pro35S:MpFER-GFP*) was transformed into heterozygous *Atfer-1* mutants. Then, GFP expression at the cell periphery and complementation of the bursting root hair and reduced rosette size phenotypes were assessed in transgenic plants (Fig. 6A). *Atfer-1* homozygotes expressing the MpFER-GFP protein look similar to *Atfer-1* mutants, indicating that MpFER does not complement these *Atfer-1* loss-of-function phenotypes (Fig. 6A). While we cannot exclude that this is because we used a heterologous promoter, we consider this unlikely as expression the 35S promoter is routinely used to complement root hair phenotypes [75], [76]. In a complementary experiment, the coding sequence of AtFER fused to the Citrine gene under the control

of the *MpEF1* promoter (*proMpEF1:AtFER-Cit*) was transformed into *amiR-MpFER3-2* plants. Ten independent lines with Citrine expression at the cell periphery were phenotypically characterized (Fig. 6B,C). All had bursting rhizoids and a reduced thallus size, similar to the parental *amiR-MpFER3-2* line, suggesting that *AtFER* does not rescue the vegetative phenotypes produced by down-regulation of *MpFER*. A sequence alignment of *AtFER* with *amiR-MpFER3* showed not complementarity (Fig. 3B), confirming that the failure to complement is not caused by a potential downregulation of *AtFER* by *amiR-MpFER3*. Taken together, these results show that *MpFER* and *AtFER* cannot substitute each other with respect to their function in cell expansion and tip growth.

In *A. thaliana*, it was shown that *AtFER* forms a complex with *AtRALF* peptides and the *LRE/LLG* co-receptors [36]. As no interspecific complementation was observed, the conservation of binding surfaces between *CrRLK1L*, *RALF*, and *LRE* homologs were analyzed. The *M. polymorpha* genome encodes three *RALF* peptides (*MpRALF1*: Mp1g27120 [Mapoly0002s0166]; *MpRALF2*: Mp2g21670 [Mapoly0040s0047]; *MpRALF3*: Mp7g07270 [Mapoly0076s0067]) [47], [48]. We performed a phylogenetic analysis using the amino acid sequences of the predicted mature peptides of *A. thaliana* and *M. polymorpha* *RALFs* (Fig. S4A). All *MpRALF* peptides clustered together with *AtRALFs* known to interact with *CrRLK1L* receptors, including *AtRALF1* and *AtRALF23*, which serve as *AtFER* ligands [23], [34] (Fig. S4A). The *MpRALFs* shared the four conserved Cys residues as well as the *YXXY* and *YY* motifs with the *AtRALF1* subgroup (Fig. S4B). However, only *MpRALF1* and *MpRALF3* had an *RRXL* motif important for *S1P* cleavage (Fig. S4B,C)[77], consistent with the presence of one *S1P* ortholog in basal plants (Mp8g07990 [Mapoly0155s0018], Fig. S4D). There are two *MpLRE/LLG* proteins encoded in the *M. polymorpha* genome (Fig. S5A,B). Both the *MpLRE1* (Mp5g09600 [Mapoly0048s0110]) and *MpLRE2* (Mp4g22100 [Mapoly0090s0020]) proteins showed conservation of the eight Cys and the *ND* motif distinctive of the family (Fig. S5B); however, *MpLRE1* did not contain a GPI anchoring site (Fig. S5B). Structure prediction using *AtLLG1* as a template [36] showed a conserved general structure (Fig. S5C,D). Some of the *MpRALF* and *MpLRE* family members show a similar expression pattern as *MpFER* (Fig. S5F), suggesting that the corresponding proteins could form a complex similar to that described in *A. thaliana*.

To gain insights into the formation of a putative CrRLK1L signaling complex, the MpFER/MpRALF/MpLRE complex was modelled. The general structure appeared conserved (Fig. S5E); however, analysis of conserved sites between *M. polymorpha* and *A. thaliana* showed a low amino acid conservation in the interacting surfaces of the complex subunits (Fig. 6D). This suggests that the lack of interspecific complementation may be due to differences in amino acids that are important for complex formation, and that the proteins forming the complex have diverged, following distinct routes of co-evolution in the two lineages.

Because interspecific complementation of the amiR-MpFER phenotypes was unsuccessful, we asked whether suppression using a downstream component of CrRLK1L signaling identified in *A. thaliana* was possible. AtMRI, a receptor-like cytoplasmic kinase, acts downstream of AtFER or AtANX1/2 in the regulation of polar tip growth [78], [79]. The dominant AtMRI<sup>R240C</sup> mutation can suppress pollen tube rupture in the *Atanx1/Atanx2* double mutant and the root hair defects of *Atfer-4* [78], [79]. A mutation in MpMRI (aka MpPTI) with a similar bursting rhizoid phenotype as observed in *Mpfer-1*, was identified in the same genetic screen for *M. polymorpha* mutants with defective rhizoids [59]. To test whether MpMRI is a conserved downstream component of the MpFER signal transduction pathway, a dominant-active form of the protein equivalent to AtMRI<sup>R240C</sup> was transformed into the amiR-MpFER3-2 line, driven by 2 kb of the endogenous promoter (*proMpMRI:MpMRI<sup>R240C</sup>*). Several independent lines showed a partial restoration of rhizoid growth; however, we also observed defects in thallus development of lines with higher levels of MpMRI expression, mainly abnormalities in the epidermis (Figs. 6E and S6A-E). This suggest that MpMRI acts downstream of MpFER in the signal transduction pathway controlling polarized growth since the origin of land plants, in agreement with a recent report on the functional characterization of MpMRI [60].

### Overexpression of MpFER affects morphological integrity

Because overexpressing AtFER in *M. polymorpha* did neither lead to any obvious phenotypes nor complementation of amiR-MpFER lines (Fig. 6B,C), we also overexpressed AtFER and MpFER in the wild type. As in the amiR-MpFER background, overexpression of AtFER (*proMpEF1:AtFER-Cit*) in a wild-type background had no effect, consistent with the idea that AtFER is unable to form a complex with the

corresponding *M. polymorpha* proteins. However, when expressing an MpFER-Citrine fusion protein (*proMpEF1:MpFER-Cit*) in wild-type plants, thallus development was strongly affected (Fig. 7A). As expected, MpFER-Cit localized to the membrane (Fig. 7A inset), and higher protein levels correlated with more severe phenotype (Fig. S6F,G). Scanning electron microscopy of epidermis of plant expressing high levels of MpFER showed defects in the formation of air chambers and air pores (Fig. 7B), similar to what we observed when expressing the dominant-active MpMRI<sup>R240C</sup> (Fig. S6A-C). This phenotype is reminiscent of the *quasimodo1* mutant in *A. thaliana*, in which cell walls have a reduced pectin content and cell adhesion is compromised [80]. Moreover, overexpression of MpFER affects the number of lobes in the antheridial receptacle, producing only 4 instead of 8 (Fig. S6H), supporting the importance of MpFER during sexual development. Considering the importance of MpFER for normal rhizoid formation, we also analyzed rhizoids in the *proMpEF1:MpFER-Cit* lines: while rhizoid morphology looked normal, a decrease in rhizoid number was observed (Fig. 7C,D). To analyze cell wall properties of MpFER overexpressor lines, chlorophyll efflux rates were measured, as an indicator for epidermal permeability (Fig. 7E). Overexpression of MpFER clearly reduced the chlorophyll efflux compared to the wild type, while the opposite was observed in *Mpfer-2* mutants (Fig. 7E). Taken together, the results obtained by overexpressing MpFER support a role of MpFER in cell wall formation and the maintenance of tissue integrity during plant morphogenesis.

## Discussion

During land plant evolution, many developmental aspects have changed in order to adapt to new environments, producing the enormous diversity observed in the plant kingdom. However, the control and maintenance of CWI remained a key aspect for the biology of a plant cell. CWI sensing is not only important for vegetative growth by cell expansion, but it is also essential for sexual reproduction and defense responses.

The CrRLK1L family was first characterized for its importance during angiosperm fertilization, a process comprising aspects of polar cell elongation, CWI control, and cell-cell communication [7], [31], [32]. Lately, different members of this family were found to carry out diametrically opposite roles in diverse aspects of plant development, which

has made it difficult to define the core or ancestral function of this gene family comprising 17-members in *A. thaliana* [7]–[13], [15]–[21], [33].

Here, we report the characterization of the single *CrRLK1L* gene encoded in the genome of *M. polymorpha*. Structurally, the MpFER ECD and kinase domain share similarities with previous characterized *CrRLK1L* members, including the malectin-like domain and conserved phosphorylation sites. Conservation of RALF and LRE members in *M. polymorpha* suggests that MpFER also forms a complex at the plasma membrane [36]. While modeling predicted that the general structure of the complex was conserved, the interaction surfaces seem to have diverged and co-evolved independently in the respective lineages.

We observed a broad involvement of MpFER at both vegetative and reproductive stages of development: During vegetative growth of the gametophyte, MpFER is required for rhizoid formation and cell expansion but it also plays a role in male gametogenesis and is expressed in female reproductive organs. These findings suggest that the *CrRLK1L*s have, also in ancestral land plants, held roles in various aspects of both vegetative and reproductive development. Thus, the role of *CrRLK1L*s in angiosperm reproduction does not represent a derived feature from a purely vegetative function in cell elongation in bryophytes but constitutes a conserved feature of this gene family.

Moreover, the almost ubiquitous expression of MpFER in *M. polymorpha* is consistent with the collective expression of different *CrRLK1L* members in essentially all tissues and organs of *A. thaliana* [44]. Thus, gene duplication allowed the expansion of the *CrRLK1L* family in angiosperms, diversifying their expression patterns and functions but also leading to genetic redundancy [9], [18], [33], [44].

*CrRLK1L* members are important sensors of CWI during polarized growth, both in pollen tubes [9], [33] and root hairs [17]. In early divergent land plants, rhizoids are tip-growing cell with a function analogous to that of root hairs, important for taking up nutrients and water [59], [81]. Based on the conservation of many genes controlling the development and growth of tip-growing cells forming rooting systems, it was suggested that these pathways were active in the earliest land plants that existed about 470 million years ago [59]. That MpFER also controls rhizoid integrity points to the importance of the *CrRLK1L* pathway for polarized growth since the origin of land plants. Moreover, the fact that amorphic *Mpfer* mutants contain many dead cells demonstrates the importance



of the CrRLK1L pathway for cellular integrity during vegetative growth. As the occurrence of dead cells was recently also reported in *Atfer-4* mutant seedlings [74], the function of this pathway in maintaining cellular integrity may also be ancestral. Whether MpFER also plays a central role in plant innate immunity, as it does in angiosperms [16], [23], remains to be determined.

The signaling mechanisms downstream of MpFER in *M. polymorpha* development are still unclear. MpMRI, the *M. polymorpha* ortholog of AtMRI, which acts downstream of AtFER and AtANX1/2 in *A. thaliana* during polarized growth [78], does have a similar rhizoid phenotype as MpFER [59], [60]. The suppression of the rhizoid phenotype in amiR-MpFER transformants with the constitutively active form MpMRI<sup>R240C</sup> corroborates a conserved CrRLK1L signaling cascade during polarized growth in *M. polymorpha* but whether this pathway also relies on Ca<sup>2+</sup> and reactive oxygen species (ROS) as second messengers as it does in *A. thaliana* remains to be determined.

In *A. thaliana*, loss-of-function mutations in the motor protein AtKINESIN-13a, a microtubule-based motor, cause cell elongation in petals, leaves, and hypocotyls concomitant with changes in cell wall composition in leaves [82]. This effect depends on functional AtTHE1 and does not occur in *Atkinesin-13-a/Atthe1* double mutants. Interestingly, in this case, AtTHE1 stimulates cell elongation in response to defects in cell wall deposition [82]. Based on our results, we have no indication that MpFER acts as a CWI sensor and regulates growth similar to AtTHE1 in response to cell wall disturbances. We have not observed a context in *M. polymorpha* development in which MpFER inhibits cell expansion. Therefore, the ability to restrict growth in response to disturbances in CWI could represent an evolutionary derived feature, as gene duplication allowed for the diversification and specialization of CrRLK1Ls to regulate cellular growth in a more complex and context-dependent way. The capacity to flexibly regulate growth appears to be fundamentally context-dependent, as a similar discrepancy in promoting or inhibiting growth is also known for some well-studied growth promoting agents, like the phytohormones auxin and brassinosteroid, which can have growth-inhibitory effects dependent on tissue and concentration. The reverse was noted for the phytohormones ethylene and abscisic acid, which are usually considered growth inhibitors but can also promote growth, dependent on the context [83]–[85].

Taken together, our results suggest an ancestral and conserved function of the CrRLK1Ls in polar cell growth and cell expansion, but also during sexual reproduction.

In addition, we probe the relevance of *CrRLK1L* members for cell integrity and morphogenesis. In angiosperms, *CrRLK1L*s occupy an important position at the interface of developmental and environmental inputs, which are integrated by a downstream signaling machinery that controls cell shape and polar growth to ensure normal development, e.g., by preventing cell rupture upon CWI defects. Whether the same downstream machinery is utilized in a similar fashion in *M. polymorpha* remains to be shown, even though the similarity in function points to a related mechanism. Even less is known about upstream aspects of *CrRLK1L* signaling. Future studies on the transcriptional regulation and the upstream components, such as the putative RALF ligand(s), in the highly simplified *M. polymorpha* system could provide fundamental insights into the molecular mechanism of the *CrRLK1L* pathway, which is so central to land plant physiology, growth, and development.

## Materials and methods

### Experimental model

*M. polymorpha* subsp. *ruderalis* (Bischl. & Boissel.-Dub.) plants of the Tak-1 accession were grown on sterile culture on half-strength Gamborg's B5 basal medium (PhytoTechnology Laboratories), supplemented with 1% phytoagar in Petri dishes sealed with air-permeable tape. The plants were kept under fluorescent light and long-day conditions (16 h light at 22°C, 8 h dark at 20°C) in Percival growth cabinets (models AR-41L3 and AR-41/L2). Alternatively, to induce sexual reproduction, plants were cultivated in jiffy pots filled with a 1:1 mixture of soil ("Einheitserde D73 + Bims", Universalerde) and sand or in culture boxes in sterile culture on half-strength Gamborg's B5 basal medium (Duchefa Eco2 Box, #E1654), under fluorescent light supplemented with far-red light (GreenPower LED module HF far-red, #929000464503 and #929000632103 Philips).

Wild-type plants in all experiments were *Arabidopsis thaliana* L. (Heyn) accession Ler-0. The *Atfer-2* mutant was obtained from the Signal Collection at the Salk Institute. Plants were grown in soil (ED73; Universalerde), covered with a thin quartz sand layer, under long photoperiods (16 hs light/8 hs dark) at 23°C and 60% relative humidity.

## Phylogenetic analysis

Protein sequences were identified in plant genomes via BLASTp searches in <https://phytozome.jgi.doe.gov/pz/portal.html>. To elucidate the evolutionary relationship across land plant evolutionary history, we focused on *A. thaliana*, *Selaginella moellendorffii*, *Physcomitrium patens* and *M. polymorpha*, as representative species for angiosperms, lycophytes, mosses and liverworts, respectively. Complete or partial coding protein sequences were aligned using the ClustalW parameters and were conducted in MEGA7. Phylogenetic trees were constructed with Neighbor-joining method, with a bootstrap test of 1000 replicates. The evolutionary distances were computed using the Poisson correction method.

## Vector construction

Expression constructs: a BJ36 plasmid [86] containing a tripleVENUS-NLS (trpVNS) fragment was modified by adding a ligation-independent cloning (LiC) adapter site [87]. A promoter fragment of Mp*FER* of 3.2 kb was amplified using primers specified below and cloned into the BJ36 vector via LiC cloning. *pro*Mp*FER* promoter fragment fused to trpVNS was then shuttled via *NotI* restriction sites into the HART01 [86] expression vector. The expression vector was also directly modified to contain the LiC sites, so promoter fragments can now be directly cloned in front of the trpVNS in the HART01 vector via LiC-cloning. This vector was called VHL (trpVNS-containing HART01 vector with LiC sites).

amiRNA constructs: For functional analyses three independent artificial microRNA (amiRNA) constructs were made (Fig. S2). The endogenous microRNA precursor Mp*miR160* was used as both backbone and template to design the constructs which generate single species small RNA molecules of 21 nt length, complementary to the target gene transcript [67], [88]. Three miR160 backbones containing independent amiR-Mp*FER*/amiR-Mp*FER*\* duplexes were synthesized by GenScript and fused to the *pro*Mp*EF1* promoter in the BJ36 shuttle vector and shuttled to the HART01 expression vector as described previously [88]. The folding structure and design procedures were explained in detail in [67], [88]. The sequences for the amiRNAs were designed to retain the exact physical properties of the endogenous Mp*miR160* template. The folding patterns were analyzed in the Mfold software [89] and the sequences synthesized (Fig. S2).

CRISPR/Cas gRNA: Selection of target sites was done using CasFinder [90]. Complementary oligos were designed and annealed for ligation into gRNA, in the pMpGE\_En03 vector, previously digested with BsaI restriction enzyme. Resulting gRNAs were incorporated into binary vector pMpGE011 through gateway recombination.

Over-expression of MpFER and AtFER: The full-length MpFER sequence was amplified from genomic *M. polymorpha* DNA with attB sites and Gateway-cloned via pDONR207. For *A. thaliana* expression, MpFER was introduced into the expression vectors pMDC201, which contains a 2X35S promoter fragment and an in-frame C-terminal mGFP6 [91]. For *M. polymorpha* expression, MpFER was introduced into the binary vector pMpGWB308, which contains a MpEF1 promoter and an in-frame C-terminal citrine [92]. Similarly, for expression of AtFER in *M. polymorpha*, coding sequence of AtFER was introduced into pMpGWB308 binary vector, for the generation of *pro*MpEF1:AtFER-Cit construct.

### **Quantitative real-time PCR (qRT-PCR) and droplet digital PCR (ddPCR)**

RNA extraction from *M. polymorpha*: RNA extraction from thallus tissue (ca. 100mg including apical notch) was done using the Rneasy plant mini kit (#74904, Qiagen). To remove contaminating DNA, the TURBO DNAfree™ Kit (AM1907 Ambion) was used according to manufacturer's recommendations. To extract RNA from the gametophores (2 antheridiophores > 5mm diameter were pooled, respectively, for each replicate), the Direct(-zol) RNA MiniPrep (#R2050, ZymoResearch) was used with TRIzol Reagent (#15596026, Ambion) according to the manufacturer's protocol, including on-column DNase digestion and subsequent TURBO DNA-free™ Kit (AM1907 Ambion) treatment. RNA samples were quantified using the Qubit® RNA HS Assay Kit (#Q32852, Life Technologies), a Nanodrop ND-1000 Spectrometer or an Agilent 2100 BioAnalyzer.

cDNA synthesis: cDNA was synthesized from 0.5 µg or 1.0 µg of total RNA. Reverse transcription was performed in 25 µl with 20µg/ml Oligo(dT) 12-18 primers and 200 units of SuperScript® II Reverse Transcriptase (#18064-014, Invitrogen) according to the manufacturer's protocol. The resulting cDNA was diluted 1:9 by adding nuclease-free water. To control for genomic DNA contamination, control replicates of all samples were incubated without SuperScript® II reverse transcriptase.

Primer tests and quantitative RT-PCR: Primer efficiency and concentration tests were carried out for *MpFER* and suitable reference genes as described previously (Rövekamp et al., 2016, Althoff et al., 2014). Amplification experiments were carried out using a 7500 Applied Biosystem Fast Real-Time PCR System. Reactions were performed in 20  $\mu$ l volumes containing 10  $\mu$ l 2X SYBR-green mastermix (SsoAdvanced™ Universal SYBRGreen Supermix), 200 nM (*MpEF1* and *MpFER*) or 250 nM (*MpACTIN*) forward and reverse primers, and 1  $\mu$ l diluted cDNA. Where possible, three technical and biological replicates were performed for each reaction. The primers used for the qRT-PCR are summarized in Table S1.

For ddPCR analysis, individual PCR reactions were performed in a total volume of 25  $\mu$ l, using 1X ddPCR EvaGreen Supermix, with droplets generated according to manufacturer's recommendations. Reading of the PCR-amplified droplets was carried out by the QX200 Droplet Reader (Bio-Rad) and analysed by the QuantaSoft™ Software (v1.4, Bio-Rad). The counts from ddPCR were normalised through a log2 transformation. Afterwards, relative expression was calculated against the geometric mean of the counts for all three reference genes (*MpACT1*, *MpACT7*, and *MpAPT3*) [93]: ( $\log_2(\text{gene tested} + 1) - \log_2(\text{geom. mean of all references} + 1)$ ). The primers used for the ddPCR are summarized in Table S1.

### 3' RACE-PCR

RNA from wild-type and *Mpfer-1* mutant plants were extracted as previously described. A poly(G)-tail was added at the 3' end of the RNA according to a Poly(A) Polymerase protocol (Thermo Scientific), using GTP instead of ATP. Reverse transcription was performed using anchored Oligo(dC) instead of Oligo(dT). Nested PCR on the cDNA was performed using two forward primers that matched the 3' UTR sequence of *MpFER* (3'RACE-Fwd1 and 3'RACE-Fwd2) and Oligo(dC). PCR fragments were purified and sequenced.

### Transformation of *M. polymorpha* and *A. thaliana*

*Agrobacterium*-mediated transformation using regenerating thalli of *M. polymorpha* was done by co-cultivation 15-day old plant fragments with transformed *Agrobacterium tumefaciens* (GV3101) cells [94], [95]. After three days of incubation, positive transformants were selected on Gamborg's B5 plates supplemented with 10  $\mu$ g/ml

Hygromycin B (Invitrogen), 0.5  $\mu$ M Chlorosulfuron or Kanamycin, and 100  $\mu$ g/ml of Cefotaxime sodium. Isogenic lines were obtained by using plants derived from gemmae of the T1 generation (G1 generation). G1 or subsequent gemmae generations were used for all experiments, as they are derived from single cells [96], [97]. Transformation of *A. thaliana* via *A. tumefaciens* (GV3101) was performed by floral dipping according to [98]. Primers used for amplification of promoter fragments of Mp*FER* are listed in Table S2.

## Microscopy

Plants were observed in a Lumar.V12 (Zeiss) or a Leica MZFLIII dissection microscope and photographed with an AxioCam HRc (Zeiss) or Leica DFC 420C camera. Clearings were observed using a Leica DMR microscope and photographed with an Axiocam 105 color camera. Fluorescence reporter expression were analyzed using a Leica SP5 confocal microscope. Fiji [99] and GIMP (version 2.8.10) software were used for adjustments of brightness, contrast, channel selection, and image size.

Tissue clearing for bright field microscopy: *M. polymorpha* tissues were fixed in Carnoy's solution and incubated at 4°C overnight, followed by rehydration in an ethanol (EtOH) series of 85%, 70%, 50%, and 30%. Samples were incubated for 1 hour at 4°C for each step and then incubated in chloral hydrate solution at 4°C overnight. Samples were mounted in chloral hydrate.

Calcofluor-white staining for cell size measurements: Pieces of fresh thallus tissue located in fully differentiated zones [100] of plants grown on plates were dissected out and put into water. The pieces were transferred to PBS pH 6.1 containing 100  $\mu$ g/ml Calcofluor-white and vacuum-infiltrated for 1 hour before being mounted on slides. The area of the epidermal cells was measured using Imaris 8.3.1. software. Cells of air pores and the two adjacent cell layers were excluded from the analysis, as well as the spiralling cells surrounding newly developing air pores.

For cell-death staining, seven-day old gemmalings were stained with lactophenol-trypanblue (10 mL of lactic acid, 10 mL of glycerol, 10 g of phenol, 10 mg of trypan blue, dissolved in 10 mL of distilled water) and boiled for approximately 1 min in the stain solution and then decolorized in chloral hydrate (2.5 g of chloral hydrate dissolved in 1 mL of distilled water) for at least 30 min. They were mounted in chloral hydrate and imaged in dissecting microscope.



For scanning electron microscopy (SEM), 20-day old plants of WT and *proMpEF1:MpFER-Cit* lines #5 and #9 were harvested and fixed in using Glutaraldehyde (0.25% in 20mM HEPES) over night at 4 °C. After fixation, dehydration with Acetone series (from 50% to 100% acetone “ultradry”) was done. The samples were then critical point dried, without the following sputter coated step. Microscopic imaging was done on a JSM-6010 (Jeol, Freising, Germany) at the Center for Microscopy and Image Analysis at the University of Zurich.

To evaluate the stiffness of the gemmaling tissue, we used cellular force microscopy (CFM; [101], [102]). A microelectromechanical systems (MEMS)-based FT-S100 force sensor (FemtoTools AG, Buchs, Switzerland) with a glued-on tungsten probe (T-4-22; Picoprobe by GGB Industries INC, Naples, FL, USA) was used to indent the gemmaling tissue. The sensor has a force range of  $\pm 100 \mu\text{N}$  and a resolution of 15 nN measured at 500 Hz. The sensor was attached with a custom-made acrylic arm to a xyz positioner (SLC-2460-M; SmarAct), which was fixed on a xyz piezo stage (P-563.3CD PIMars; Physik Instrumente (PI) GmbH & Co., Karlsruhe, Germany). The xyz positioner was used for the rough positioning of the sensor on a part of a gemma that was as much as possible in contact with the supporting glass slide and away from the meristematic zones. Nine evenly spaced measurements were then taken in a 3-by-3 grid, again using the xyz positioner to place the sensor, while the indentation at each position was driven by the piezo stage. This procedure was repeated a second time on each gemmaling, whenever possible on the opposite lobe.

The stiffness analysis was achieved with Matlab (Mathworks, Natick, MA, USA) based on the slope fitted to the force-displacement curves, which were acquired by CFM. In a first round of data curation, each force-indentation curve was visually inspected, and curves that didn't have a clear contact point or showed a clear displacement of the gemmaling, indicated by an irregular slope, were discarded. The remaining data exhibited a bimodal distribution with a high density at very soft values around 1  $\mu\text{N}$ , indicating the presence of an artefact due to gemmalings that were not in contact with the slide and, therefore, were displaced rather than indented. To identify such failed measurements, we pooled all data and fitted a Gaussian mixture model with two components. We then removed all measurements that were closer than 3 standard deviations to the mean of the distribution with the smallest mean (mean = 1.16  $\mu\text{N}$  and sd = 0.56  $\mu\text{N}$ ). Hence, all measurements with a value below 2.9  $\mu\text{N}$  were removed.

Boxplots and statistical analysis were performed in Matlab. The statistical tests used to assess the significance of differences between groups are indicated in the figure legends.

### **Western blot analysis**

*M. polymorpha* explants were ground in liquid nitrogen and resuspended in 300 µL of Laemmli buffer [103]. After centrifugation at 6,000 rpm for 5 min at 4°C, the supernatant was recovered. Protein accumulation was confirmed by Western blotting, using the anti-GFP antibody (1:3000, Torrey Pines Biolabs). As secondary antibodies, the Agrisera S09602 goat anti-rabbit antibody was used with the ECL-chemistry of FUSION FX - Western Blot & Chemi Imaging (Vilber Lourmat).

### **Growth rate experiments**

Gemmae of wild-type, *Mpfer-1*, and independent transformation lines of amiR-Mp*FER* lines were grown on plates and the thallus area was measured over time. 10 or 30 gemmae of four independent transformation lines were grown on half-strength Gamborg's B5 and scanned on an Epson 2450 Photo scanner at 600dpi. Plant area was measured using color threshold settings and particle analysis in the Fiji software [99].

### **Expression map**

Gene expression of CrRLK1L signaling pathway components was calculated from publicly available RNA-seq data of 39 samples of *M. polymorpha* Tak-1 and Tak.2. Samples were grouped by tissue and analyzed under the same pipeline: Nextera paired-end adapters were trimmed from sequencing reads using the bbdut tool embedded in the BBMap software package [104]. Read ends with quality below 20 were also trimmed and the minimum read length was set to 25. The rest of parameters of bbdut were set as default. Reads were mapped to *M. polymorpha* reference genome (v3.1) [48] using the Tophat software (v2.1.1) [105], designed for RNA-sequencing read mapping. Tophat contains Bowtie (v2.3.2.0) [106] as the aligner software. All parameters were set to default values except for the RAM memory and number of used Cores. Mapped reads were sorted using samtools (v1.3.1) [107] and counted with the software HTSeq-count" (v.0.9.1) [108]. Gene expression values were calculated using

the package DESeq2 (Release 3.6) [109] for R software (v3.4.4) [110]. Another R package, ggplot2 (release 2.2.1) [111] was used for producing the figures. A summary of the samples that were used in this study is provided in Table S3.

### **Chlorophyll efflux rate**

To measure the chlorophyll efflux rate, 10-day-old gemmalings were used [112]. Sixteen replicates of MpFER-overexpressor, Mp*fer-2* mutant, and wild-type lines were immersed in an 80% EtOH solution in 5-mL tubes. The tubes were agitated gently on a shaker platform. Aliquots of 2 µL were removed every min, during the first 10 minutes. The amount of chlorophyll extracted by the EtOH solution was quantified with a spectrophotometer (Nanodrop 8000, Thermo Scientific) and calculated from UV light absorption at 647 and 664 nm. The micromolar concentration of total chlorophyll per gram of fresh weight of tissue per ml of EtOH was calculated using the equation Total micromoles chlorophyll =  $7.93(A_{664}) + 19.53(A_{647})$ .

### **Three-dimensional (3D) protein structure modeling**

Comparative modeling of protein 3D structures was performed using the SWISS-MODEL online-tool [64]. The software was fed with the three protein sequences of MpFER, MpRALF1, and MpLRE1 as input to model, and one PDB file as a 3D template, which contains the published crystal structure of the protein complex formed by AtFER, AtRALF23, and AtLLG1 [36]. Quality control of the model was assessed using the same tool and the results are summarized in Table S4. Spatial comparisons of the *M. polymorpha* predicted structures with the crystal structures of *A. thaliana* were performed in PyMol (Table S4) [113].

## **QUANTIFICATION AND STATISTICAL ANALYSIS**

Analyses were performed in InfoStat (<http://www.infostat.com.ar>) or Matlab. Tests are indicated in the corresponding figure legend.

### **Acknowledgments**

We thank Liam Dolan for kindly providing the Mp*fer-1*/Mp*the* mutant, Valeria Gagliardini for help with qRT-PCR and ddPCR, Anja Grossniklaus for help in measuring epidermal cell area, Célia Baroux and Ethel Mendocillo-Sato for instructions on confocal

microscopy and the use of Imaris Software, Tiago Meier for helping with sample preparation for SEM microscopy, Isabel Monte and Cyril Zipfel for comments on the manuscript, and Christof Eichenberger, Frédérique Pasquer, Arturo Bolaños, Daniela Guthörl, Daniel Prata, and Peter Kopf for general lab support.

## **Author contributions**

MAM: Conceptualization, Formal analysis, Investigation, Methodology, Validation, Visualization, Writing – original draft, Writing – review & editing

MR: Conceptualization, Formal analysis, Investigation, Methodology, Validation, Visualization, Funding acquisition, Writing – original draft, Writing – review & editing

AG-F: Data curation, Formal analysis, Software, Validation, Visualization, Writing – original draft, Writing – review & editing

DL: Investigation, Validation

DM: Formal analysis, Investigation, Validation, Writing – review & editing

PG: Formal analysis, Investigation, Validation, Writing – review & editing

HV: Formal analysis, Investigation, Validation, Writing – review & editing

JLB: Funding acquisition, Resources, Supervision, Validation, Writing – review & editing

UG: Conceptualization, Formal analysis, Funding acquisition, Project administration, Supervision, Validation, Writing – original draft, Writing – review & editing

## **Funding disclosure**

This work was supported by the University of Zurich, Monash University, and grants from the Forschungskredit of the University of Zurich (FK-16-090, <http://www.research.uzh.ch/en/funding/phd/fkcandoc>) to MR, the Australian Research Council (<http://www.arc.gov.au>; DP130100177) to JLB, and the Swiss National Science Foundation (<http://www.snf.ch>; 310030B\_160336 and 31003A\_179553) to UG. The funders had no role in study design, data collection and analysis, decision to publish, or preparation of the manuscript.

## **Competing interests**

The authors have declared that no competing interests exist.

## References

- [1] Zhu S, Fu Q, Xu F, Zheng H, Yu F., 'New paradigms in cell adaptation: decades of discoveries on the CrRLK1L receptor kinase signalling network.', *New Phytol*, vol. 232, no. 3, pp. 1168–1183, 2021.
- [2] Showalter AM., 'Structure and function of plant cell wall proteins.', *Plant Cell*, vol. 5, pp. 9–23, 1993.
- [3] Franck CM, Westermann J, Boisson-Dernier A., 'Plant Malectin-Like Receptor Kinases: From Cell Wall Integrity to Immunity and Beyond', *Annu Rev Plant Biol*, vol. 69, pp. 301–328, 2018.
- [4] Shiu SH, Bleecker AB., 'Plant receptor-like kinase gene family: diversity, function, and signaling', *Sci STKE*, vol. 2001, no. 113, p. re22, 2001.
- [5] Steinwand BJ, Kieber JJ., 'The role of receptor-like kinases in regulating cell wall function', *Plant Physiol.*, vol. 153, pp. 479–84, 2010.
- [6] Wolf S, Hématy K, Hofte H., 'Growth control and cell wall signaling in plants', *Annu Rev Plant Biol*, vol. 63, pp. 381–407, 2012.
- [7] Escobar-Restrepo J-M, Huck N, Kessler S, Gagliardini V, Gheyselinck J, et al., 'The FERONIA receptor-like kinase mediates male-female interactions during pollen tube reception', *Science*, vol. 317, pp. 656–660, 2007.
- [8] Hématy K, Sado PE, Van Tuinen A, Rochange S, Desnos T, et al., 'A receptor-like kinase mediates the response of Arabidopsis cells to the inhibition of cellulose synthesis', *Curr Biol.*, vol. 17, pp. 922–931, 2007.
- [9] Boisson-Dernier A, Roy S, Kritsas K, Grobei MA, Jaciubek M, Schroeder, J.I., Grossniklaus, U., 'Disruption of the pollen-expressed FERONIA homologs ANXUR1 and ANXUR2 triggers pollen tube discharge', *Development*, vol. 136, pp. 3279–3288, 2009.
- [10] Guo H, Li L, Ye H, Yu X, Algreen A, Yin Y., 'Three related receptor-like kinases are required for optimal cell elongation in Arabidopsis thaliana', *PNAS*, vol. 106, pp. 7648–7653, 2009.
- [11] Guo H, Ye H, Li L, Yin Y., 'A family of receptor-like kinases are regulated by BES1 and involved in plant growth in Arabidopsis thaliana', *Plant Signal Behav*, vol. 4, no. 8, pp. 784–786, 2009.
- [12] Kessler SA, Shimosato-Asano H, Keinath NF, Wuest SE, Ingram G, et al., 'Conserved molecular components for pollen tube reception and fungal invasion', *Science*, vol. 330, pp. 968–971, 2010.
- [13] Bai L, Ma X, Zhang G, Song S, Zhou Y, et al., 'A receptor-like kinase mediates ammonium homeostasis and is important for the polar growth of root hairs in Arabidopsis', *Plant Cell*, vol. 26, pp. 1497–511, 2014.
- [14] Schoenaers S, Balcerowicz D, Breen G, Hill K, Zdanio M, Mouille G, Holman TJ, Oh J, Wilson MH, et al., 'The Auxin-Regulated CrRLK1L Kinase ERULUS Controls Cell Wall Composition during Root Hair Tip Growth.', *Curr. Biol.*, vol. 28, pp. 722–732, 2018.
- [15] Miyazaki S, Murata T, Sakurai-Ozato N, Kubo M, Demura T, et al., 'ANXUR1 and 2, sister genes to FERONIA/SIRENE, are male factors for coordinated fertilization', *Curr Biol.*, vol. 19, pp. 1327–1331, 2009.
- [16] Keinath NF, Kierszniowska S, Lorek J, Bourdais G, Kessler SA, Shimosato-Asano H, Grossniklaus U, Schulze WX, Robatzek S, Panstruga RJ, 'PAMP (pathogen-associated molecular pattern)-induced changes in plasma membrane compartmentalization reveal novel components of plant immunity.', *J Biol Chem*, vol. 285, pp. 39140–39149, 2010.
- [17] Duan Q, Kita D, Li C, Cheung AY, Wu HM., 'FERONIA receptor-like kinase regulates RHO GTPase signaling of root hair development', *PNAS*, vol. 107, pp. 17821–17826, 2010.
- [18] Galindo-Trigo S, Blanco-Touriñán N, DeFalco TA, Wells ES, Gray JE, Zipfel C, Smith LM., 'CrRLK1L receptor-like kinases HERK1 and ANJEA are female determinants of pollen tube reception', *EMBO Rep*, vol. 21, no. 2, p. e48466, 2020.

- [19] Zhu L, Chu LC, Liang Y, Zhang XQ, Chen LQ, Ye D., 'The Arabidopsis CrRLK1L protein kinases BUP1 and BUP2 are required for normal growth of pollen tubes in the pistil', *Plant J*, vol. 95, no. 3, pp. 474–486, 2018.
- [20] Li C, Yeh F-L, Cheung AY, Duan Q, Kita D, et al., 'Glycosylphosphatidylinositol-anchored proteins as chaperones and co-receptors for FERONIA receptor kinase signaling in Arabidopsis', *eLife*, vol. 4, p. e06587, 2015.
- [21] Richter J, Ploderer M, Mongelard G, Gutierrez L, Hauser MT., 'Role of CrRLK1L Cell Wall Sensors HERCULES1 and 2, THESEUS1, and FERONIA in Growth Adaptation Triggered by Heavy Metals and Trace Elements', *Front Plant Sci*, vol. 8, p. 1554, 2017.
- [22] Richter J, Watson JM, Stasnik P, Borowska M, Neuhold J, Berger M, Stolt-Bergner P, Schoft V, Hauser MT., 'Multiplex mutagenesis of four clustered CrRLK1L with CRISPR/Cas9 exposes their growth regulatory roles in response to metal ions', *Sci Rep*, vol. 8, no. 1, p. 12182, 2018.
- [23] Stegmann M, Monaghan J, Smakowska-Luzan E, Rovenich H, Lehner A, et al., 'The receptor kinase FER is a RALF-regulated scaffold controlling plant immune signaling', *Science*, vol. 355, pp. 287–289, 2017.
- [24] Ngo QA, Vogler H, Lituiev DS, Nestorova A, Grossniklaus U., 'A calcium dialog mediated by the FERONIA signal transduction pathway controls plant sperm delivery', *Dev Cell*, vol. 29, pp. 491–500, 2014.
- [25] Yu F, Qian L, Nibau C, Duan Q, Kita D, et al., 'FERONIA receptor kinase pathway suppresses abscisic acid signaling in Arabidopsis by activating ABI2 phosphatase', *PNAS*, vol. 109, pp. 14693–14698, 2012.
- [26] Mao D, Yu F, Li J, Van de Poel B, Tan D, et al., 'FERONIA receptor kinase interacts with S-adenosylmethionine synthetase and suppresses S-adenosylmethionine production and ethylene biosynthesis in Arabidopsis', *Plant Cell Env.*, vol. 38, pp. 2566–2574, 2015.
- [27] Deslauriers SD, Larsen PB., 'FERONIA is a key modulator of brassinosteroid and ethylene responsiveness in Arabidopsis hypocotyls', *Mol Plant*, vol. 3, pp. 626–640, 2010.
- [28] Shih H-W, Miller ND, Dai C, Spalding EP, Monshausen GB., 'The receptor-like kinase FERONIA is required for mechanical signal transduction in Arabidopsis seedlings', *Curr Biol.*, vol. 24, pp. 1887–1892, 2014.
- [29] Denness L, McKenna JF, Segonzac C, Wormit A, Madhou P, et al., 'Cell wall damage-induced lignin biosynthesis is regulated by a reactive oxygen species- and jasmonic acid-dependent process in Arabidopsis', *Plant Physiol*, vol. 156, pp. 1367–1374, 2011.
- [30] Okuda S, Tsutsui H, Shiina K, Sprunck S, Takeuchi H, Yui R, Kasahara RD, Hamamura Y, Mizukami A, Susaki D, Kawano N, Sakakibara T, Namiki S, Itoh K, Otsuka K, Matsuzaki M, Nozaki H, Kuroiwa T, Nakano A, Kanaoka MM, Dresselhaus T, Sasaki N, Higashiyama T., 'Defensin-like polypeptide LUREs are pollen tube attractants secreted from synergid cells', *Nature*, vol. 458, no. 7236, pp. 357–361, 2009.
- [31] Huck N, Moore JM, Federer M, Grossniklaus U., 'The Arabidopsis mutant *feronia* disrupts the female gametophytic control of pollen tube reception', *Development*, vol. 130, pp. 2149–2159, 2003.
- [32] Rotman N, Rozier F, Boavida L, Dumas C, Berger F, Faure J-E., 'Female control of male gamete delivery during fertilization in Arabidopsis thaliana', *Curr Biol.*, vol. 13, pp. 432–436, 2003.
- [33] Ge Z, Bergonci T, Zhao Y, Zou Y, Du S, et al., 'Arabidopsis pollen tube integrity and sperm release are regulated by RALF-mediated signaling', *Science*, vol. 358, pp. 1596–1600, 2017.
- [34] Haruta M, Sabat G, Stecker K, Minkoff BB, Sussman MR., 'A peptide hormone and its receptor protein kinase regulate plant cell expansion', *Science*, vol. 343, pp. 408–411, 2014.
- [35] Dünser K, Gupta S, Herger A, Feraru MI, Ringli C, Kleine-Vehn J., 'Extracellular matrix sensing by FERONIA and Leucine-Rich Repeat Extensins controls vacuolar expansion during cellular elongation in Arabidopsis thaliana', *EMBO J*, vol. 38, no. 7, p. pii: e100353, 2019.



- [36] Xiao Y, Stegmann M, Han Z, DeFalco TA, Parys K, Xu L, Belkhadir Y, Zipfel C, Chai J., 'Mechanisms of RALF peptide perception by a heterotypic receptor complex', *Nature*, vol. 572, no. 7768, pp. 270–274, 2019.
- [37] Mecchia MA, Santos-Fernandez G, Duss NN, Somoza SC, Boisson-Dernier A, et al., 'RALF4/19 peptides interact with LRX proteins to control pollen tube growth in Arabidopsis', *Science*, vol. 358, pp. 1600–1603, 2017.
- [38] Capron A, Gourgues M, Neiva LS, Faure J-E, Berger F, Pagnussat G, Krishnan A, Alvarez-Mejia C, Vielle-Calzada JP, Lee YR, Liu B, Sundaresan V., 'Maternal control of male-gamete delivery in Arabidopsis involves a putative GPI-anchored protein encoded by the LORELEI gene', *Plant Cell*, vol. 20, pp. 3038–3049, 2008.
- [39] Boisson-Dernier A, Kessler SA, Grossniklaus U., 'The walls have ears: the role of plant CrRLK1Ls in sensing and transducing extracellular signals', *J Exp Bot*, vol. 62, 2011.
- [40] Hématy K, Höfte H., 'Novel receptor kinases involved in growth regulation', *Curr Opin Plant Biol.*, vol. 11, no. 3, pp. 321–328, 2008.
- [41] Cheung AY, Wu HM., 'THESEUS 1, FERONIA and relatives: a family of cell wall-sensing receptor kinases?', *Curr Opin Plant Biol*, vol. 14, no. 6, pp. 632–641, 2011.
- [42] Nissen KS, Willats WGT, Malinovsky FG., 'Understanding CrRLK1L Function: Cell Walls and Growth Control', *Trends Plant Sci*, vol. 21, no. 6, pp. 516–527, 2016.
- [43] Feng W, Kita D, Peaucelle A, Cartwright HN, Doan V, Duan Q, Liu MC, Maman J, Steinhorst L, Schmitz-Thom I, Yvon R, Kudla J, Wu HM, Cheung AY, Dinneny JR., 'The FERONIA Receptor Kinase Maintains Cell-Wall Integrity during Salt Stress through Ca<sup>2+</sup> Signaling', *Curr Biol.*, vol. 28, no. 5, pp. 666–675, 2018.
- [44] Lindner H, Müller LM, Boisson-Dernier A, Grossniklaus U., 'CrRLK1L receptor-like kinases: not just another brick in the wall', *Curr Opin Plant Biol*, vol. 15, no. 6, pp. 656–669, 2012.
- [45] Tang W, Lin W, Zhou X, Guo J, Dang X, Li B, Lin D, Yang Z., 'Mechano-transduction via the pectin-FERONIA complex activates ROP6 GTPase signaling in Arabidopsis pavement cell morphogenesis', *Curr Biol*, vol. S0960-9822, no. 21, pp. 01590–6, 2021.
- [46] Lin W, Tang W, Pan X, Huang A, Gao X, Anderson CT, Yang Z., 'Arabidopsis pavement cell morphogenesis requires FERONIA binding to pectin for activation of ROP GTPase signaling', *Curr Biol*, vol. S0960-9822, no. 21, pp. 01589–X, 2021.
- [47] Galindo-Trigo S, Gray JE, Smith LM., 'Conserved Roles of CrRLK1L Receptor-Like Kinases in Cell Expansion and Reproduction from Algae to Angiosperms', *Front Plant Sci*, vol. 7, p. 1269, 2016.
- [48] Bowman JL, Kohchi T, Yamato KT, Jenkins J, Shu S, Ishizaki K, et al., 'Insights into Land Plant Evolution Garnered from the Marchantia polymorpha Genome', *Cell*, vol. 171, no. 2, pp. 287–304.e15, 2017.
- [49] Rövekamp M, Bowman JL, Grossniklaus U., 'Back to the Rhizoids of Plant Sexual Development.', *Abstr. 23rd Int. Congr. Sex. Plant Reprod. Porto Port.*, p. <https://www.fc.up.pt/sprporto2014/doc/23rd%20International%20congress%20on%20sexual%20plant%20reproduction%20ABSBook.pdf>, 2014.
- [50] Bowman JL, Floyd SK, Sakakibara K, 'Green genes-comparative genomics of the green branch of life', *Cell*, vol. 129, no. 2, pp. 229–234, 2007.
- [51] Nishiyama T, Fujita T, Shin-I T, Seki M, Nishide H, Uchiyama I, Kamiya A, Carninci P, Hayashizaki Y, Shinozaki K, et al., 'Comparative genomics of Physcomitrella patens gametophytic transcriptome and Arabidopsis thaliana: implication for land plant evolution', *PNAS*, vol. 100, pp. 8007–8012, 2003.
- [52] Qiu YL, Li L, Wang B, Chen Z, Knoop V, Groth-Malonek M, Dombrowska O, Lee J, Kent L, Rest J, et al., 'The deepest divergences in land plants inferred from phylogenomic evidence', *PNAS*, vol. 103, pp. 15511–15516, 2006.
- [53] Wickett NJ, Mirarab S, Nguyen N, Warnow T, Carpenter E, Matasci N, Ayyampalayam S, Barker MS, Burleigh JG, Gitzendanner MA, et al., 'Phylotranscriptomic analysis of the origin and early diversification of land plants', *PNAS*, vol. 111, pp. E4859–E4868, 2014.

- [54] Mishler BD, Churchill SP, 'A cladistic approach to the phylogeny of the "bryophytes"', *Brittonia*, vol. 36, no. 4, pp. 406–424, 1984.
- [55] Kenrick P, Crane PR, 'The origin and early evolution of plants on land', *Nature*, vol. 389, pp. 33–39, 1997.
- [56] Floyd SK, Bowman JL., 'The ancestral developmental tool kit of land plants', *Int J Plant Sci*, vol. 168, pp. 1–35, 2007.
- [57] Bowman JL, Araki T, Arteaga-Vazquez MA, Berger F, Dolan L, Haseloff J, Ishizaki K, Kyoizuka J, Lin SS, Nagasaki H, Nakagami H, Nakajima K, Nakamura Y, Ohashi-Ito K, Sawa S, Shimamura M, Solano R, Tsukaya H, Ueda T, Watanabe Y, Yamato KT, Zachgo S, Kohchi T, 'The Naming of Names: Guidelines for Gene Nomenclature in Marchantia', *Plant Cell Physiol*, vol. 57, no. 2, pp. 257–261, 2016.
- [58] Ishizaki K, 'Evolution of land plants: insights from molecular studies on basal lineages', *Biosci Biotechnol Biochem*, vol. 81, no. 1, pp. 73–80, 2017.
- [59] Honkanen S, Jones VAS, Morieri G, Champion C, Hetherington AJ, Kelly S, Proust H, Saint-Marcoux D, Prescott H, Dolan L., 'The Mechanism Forming the Cell Surface of Tip-Growing Rooting Cells Is Conserved among Land Plants', *Curr Biol.*, vol. 26, no. 23, pp. 3238–3244, 2016.
- [60] Westermann J, Streubel S, Franck CM, Lentz R, Dolan L, Boisson-Dernier A., 'An Evolutionarily Conserved Receptor-like Kinases Signaling Module Controls Cell Wall Integrity During Tip Growth', *Curr Biol.*, vol. 29, no. 23, p. 4153, 2019.
- [61] Kessler SA, Lindner H, Jones DS, Grossniklaus U., 'Functional analysis of related CrRLK1L receptor-like kinases in pollen tube reception', *EMBO Rep*, vol. 16, pp. 107–115, 2014.
- [62] Hirano N, Marukawa Y, Abe J, Hashiba S, Ichikawa M, Tanabe Y, 'A Receptor-Like Kinase, Related to Cell Wall Sensor of Higher Plants, is Required for Sexual Reproduction in the Unicellular Charophycean Alga, *Closterium peracerosum-strigosum-littorale* Complex', *Plant Cell Physiol*, vol. 56, no. 7, pp. 1456–1462, 2015.
- [63] Ginanjar EF, Teh OK, Fujita T., 'Characterisation of rapid alkalinisation factors in *Physcomitrium patens* reveals functional conservation in tip growth', *New Phytol*, p. doi: 10.1111/nph.17942, 2021.
- [64] Schwede T, Kopp J, Guex N, Peitsch MC, 'SWISS-MODEL: an automated protein homology-modeling server', *Nucleic Acids Res.*, vol. 31, no. 13, pp. 3381–3385, 2003.
- [65] Liu L, Zheng C, Kuang B, Wei L, Yan L, Wang T, 'Receptor-Like Kinase RUPO Interacts with Potassium Transporters to Regulate Pollen Tube Growth and Integrity in Rice', *PLoS Genet*, vol. 12, no. 7, p. e1006085, 2016.
- [66] Schulze-Muth P, Irmeler S, Schröder G, Schröder J, 'Novel type of receptor-like protein kinase from a higher plant (*Catharanthus roseus*): cDNA, gene, intramolecular autophosphorylation, and identification of a threonine important for auto- and substrate phosphorylation', *J Biol Chem*, vol. 271, pp. 26684–26689, 1996.
- [67] Flores-Sandoval E, Dierschke T, Fisher TJ, Bowman JL., 'Efficient and Inducible Use of Artificial MicroRNAs in *Marchantia polymorpha*.', *Plant Cell Physiol*, vol. 57, pp. 281–290, 2016.
- [68] Althoff F, Kopischke S, Zobell O, Ide K, Ishizaki K, Kohchi T, Zachgo S., 'Comparison of the MpEF1 $\alpha$  and CaMV35 promoters for application in *Marchantia polymorpha* overexpression studies', *Transgenic Res.*, vol. 23, no. 2, pp. 235–244, 2014.
- [69] Sachs AB, Varani G., 'Eukaryotic translation initiation: there are (at least) two sides to every story.', *Nat Struct Biol*, vol. 7, no. 5, pp. 356–61, 2000.
- [70] Gonneau M, Desprez T, Martin M, Doblas VG, Bacete L, Miart F, Sormani R, Hématy K, Renou J, Landrein B et al., 'Receptor kinase THESEUS1 is a RAPID ALKALINIZATION FACTOR34 receptor in *Arabidopsis*', *Curr Biol.*, vol. 28, pp. 2452–2458, 2018.
- [71] Gachomo EW, Jno Baptiste L, Kefela T, Saidel WM, Kotchoni SO, 'The *Arabidopsis* CURVY1 (CVY1) gene encoding a novel receptor-like protein kinase regulates cell morphogenesis, flowering time and seed production', *BMC Plant Biol*, vol. 14, p. 221, 2014.

- [72] Merz D, Richter J, Gonneau M, Sanchez-Rodriguez C, Eder T, Sormani R, Martin M, Hématy K, Höfte H, Hauser MT, 'T-DNA alleles of the receptor kinase THESEUS1 with opposing effects on cell wall integrity signaling', *J Exp Bot*, vol. 68, pp. 4583–4593, 2017.
- [73] Chiyoda S, Ishizaki K, Kataoka H, Yamato KT, Kohchi T, 'Direct transformation of the liverwort *Marchantia polymorpha* L. by particle bombardment using immature thalli developing from spores', *Plant Cell Rep*, vol. 27, no. 9, pp. 1467–1473, 2008.
- [74] Malivert A, Erguvan Ö, Chevallier A, Dehem A, Friaud R, Liu M, Martin M, Peyraud T, Hamant O, Verger S., 'FERONIA and microtubules independently contribute to mechanical integrity in the *Arabidopsis* shoot', *PLoS Biol* 2021 Nov 121911, vol. 19, no. 11, p. e3001454, 2021.
- [75] Baumberger N, Ringli C, Keller B., 'The chimeric leucine-rich repeat/extensin cell wall protein LRX1 is required for root hair morphogenesis in *Arabidopsis thaliana*', *Genes Dev*, vol. 15, no. 9, pp. 1128–39, 2001.
- [76] Kim CM, Dolan L., 'ROOT HAIR DEFECTIVE SIX-LIKE Class I Genes Promote Root Hair Development in the Grass *Brachypodium distachyon*.' , *PLoS Genet*, vol. 12, no. 8, p. e1006211, 2016.
- [77] Srivastava R, Liu JX, Guo H, Yin Y, Howell SH, 'Regulation and processing of a plant peptide hormone, AtRALF23, in *Arabidopsis*' , *Plant J*, vol. 59, no. 6, pp. 930–939, 2009.
- [78] Boisson-Dernier A, Franck CM, Lituiev DS, Grossniklaus U., 'Receptor-like cytoplasmic kinase MARIS functions downstream of CrRLK1L-dependent signaling during tip growth', *PNAS*, vol. 112, pp. 12211–12216, 2015.
- [79] Liao H-Z, Zhu M-M, Cui H-H, Du X-Y, Tang Y, et al., 'MARIS plays important roles in *Arabidopsis* pollen tube and root hair growth', *J Integr Plant Biol*, vol. 58, pp. 927–940, 2016.
- [80] Bouton S, Leboeuf E, Mouille G, Leydecker MT, Talbotec J, Granier F, Lahaye M, Höfte H, Truong HN., 'QUASIMODO1 encodes a putative membrane-bound glycosyltransferase required for normal pectin synthesis and cell adhesion in *Arabidopsis*.' , *Plant Cell*, vol. 14, no. 10, pp. 2577–90, 2002.
- [81] Bowen EJ, 'A NOTE ON THE CONDUCTION OF WATER IN FIMBRIARIA BLEUMEANA', *Ann. Bot.*, vol. 49, no. 196, pp. 844–848, 1935.
- [82] Fujikura U, Elsaesser L, Breuninger H, Sánchez-Rodríguez C, Ivakov A, Laux T, Findlay K, Persson S, Lenhard M., 'Atkinesin-13A modulates cell-wall synthesis and cell expansion in *Arabidopsis thaliana* via the THESEUS1 pathway', *PLoS Genet*, vol. 10, no. 9, p. e1004627, 2014.
- [83] Pierik R, Tholen D, Poorter H, Visser EJ, Voesenek LA, 'The Janus face of ethylene: growth inhibition and stimulation', *Trends Plant Sci*, vol. 11, no. 4, pp. 176–183, 2006.
- [84] Wolf S, Höfte H., 'Growth Control: A Saga of Cell Walls, ROS, and Peptide Receptors', *Plant Cell*, vol. 26, no. 5, pp. 1848–1856, 2014.
- [85] Humplík JF, Bergougnoux V, Van Volkenburgh E, 'To Stimulate or Inhibit? That Is the Question for the Function of Abscissic Acid', *Trends Plant Sci*, vol. 22, no. 10, pp. 830–841, 2017.
- [86] Flores-Sandoval E, Eklund DM, Bowman, JL, 'A Simple Auxin Transcriptional Response System Regulates Multiple Morphogenetic Processes in the Liverwort *Marchantia polymorpha*', *PLoS Genet*, vol. 11, p. e1005207, 2015.
- [87] De Rybel B, van den Berg W, Lokerse AS., Liao C-Y, van Mourik H, Moller B, Llavata-Peris CI, Weijers D, 'A Versatile Set of Ligation-Independent Cloning Vectors for Functional Studies in Plants', *Plant Physiol.*, vol. 156, no. 3, pp. 1292–1299, 2011.
- [88] Rövekamp M, Bowman JL, Grossniklaus U, 'Marchantia MpRKD Regulates the Gametophyte-Sporophyte Transition by Keeping Egg Cells Quiescent in the Absence of Fertilization', *Curr. Biol.*, vol. 26, no. 13, pp. 1782–1789, 2016.
- [89] Zuker M., 'Mfold Web Server for Nucleic Acid Folding and Hybridization Prediction', *Nucleic Acids Res*, vol. 31, no. 13, pp. 3406–3415, 2003.
- [90] Aach J, Mali P, Church GM, 'CasFinder: Flexible algorithm for identifying specific Cas9 targets in genomes', *BioRxiv Doi 101101005074*, 2014.
- [91] Curtis MD, Grossniklaus U, 'A gateway cloning vector set for high-throughput functional analysis of genes in planta', *Plant Physiol.*, vol. 133, no. 2, pp. 462–469, 2003.

- [92] Ishizaki K, Nishihama R, Ueda M, Inoue K, Ishida S, Nishimura Y, Shikanai T, Kohchi T, 'Development of Gateway Binary Vector Series with Four Different Selection Markers for the Liverwort *Marchantia polymorpha*', *PLoS One*, vol. 10, no. 9, p. e0138876, 2015.
- [93] Vandesompele J, De Preter K, Pattyn F, Poppe B, Van Roy N, De Paepe A, Speleman F., 'Accurate normalization of real-time quantitative RT-PCR data by geometric averaging of multiple internal control genes', *Genome Biol*, vol. 3, no. 7, p. RESEARCH0034, 2002.
- [94] Kubota A, Ishizaki K, Hosaka M, Kohchi T, 'Efficient *Agrobacterium*-mediated transformation of the liverwort *Marchantia polymorpha* using regenerating thalli.', *Biosci Biotechnol Biochem*, vol. 77, no. 1, pp. 167–172, 2013.
- [95] Ishizaki K, Chiyoda S, Yamato KT, Kohchi, T, 'Agrobacterium-Mediated Transformation of the Haploid Liverwort *Marchantia polymorpha* L., an Emerging Model for Plant Biology', *Plant Cell Physiol.*, vol. 49, no. 7, pp. 1084–1091, 2008.
- [96] Barnes CR, Land WJG., 'Bryological papers. I. The origin of air chambers', *Bot Gaz*, vol. 44, pp. 197–213, 1907.
- [97] Hughes SJ, 'On conidia of fungi, and gemmae of algae, bryophytes, and pteridophytes', *Can J Bot*, vol. 49, pp. 1319–1339, 1971.
- [98] Bent A., 'Agrobacterium Protocols', *Totowa NJ Humana Press*, vol. Volume I, no. Second edition, 2006.
- [99] Schindelin J, Arganda-Carreras I, Frise E, Kaynig V, Longair M, Pietzsch T, Preibisch S, et al., 'Fiji: An open-source platform for biological-image analysis', *Nat. Methods*, vol. 9, no. 7, pp. 676–682, 2012.
- [100] Solly JE, Cunniffe NJ Harrison CJ, 'Regional Growth Rate Differences Specified by Apical Notch Activities Regulate Liverwort Thallus Shape', *Curr. Biol.*, vol. 27, no. 1, pp. 16–26, 2017.
- [101] Felekis D, Muntwyler, S., Vogler H, Beyeler F, Grossniklaus U and Nelson BJ, 'Quantifying growth mechanics of living, growing plant cells in situ using microrobotics.', *Micro Nano Lett*, vol. 6, pp. 311–6, 2011.
- [102] Vogler H, Draeger C, Weber A, Felekis D, Eichenberger C, Routier-Kierzkowska AL, Boisson-Dernier A, Ringli C, Nelson BJ, Smith RS, Grossniklaus U., 'The pollen tube: a soft shell with a hard core. 2013 Feb;73(4):617-27.', *Plant J*, vol. 73, no. 4, pp. 617–27, 2013.
- [103] Laemmli UK, 'Cleavage of structural proteins during the assembly of the head of bacteriophage T4', *Nature*, vol. 227, no. 5259, pp. 680–685, 1970.
- [104] Bushnell B, 'BBMap: a fast, accurate, splice-aware aligner (No. LBNL-7065E)', *Lawrence Berkeley Natl. Lab LBNL Berkeley CA U. S.*, 2014.
- [105] Trapnell C, Pachter L, Salzberg SL, 'TopHat: discovering splice junctions with RNA-Seq', *Bioinformatics*, vol. 25, no. 9, pp. 1105–1111, 2009.
- [106] Langdon WB, 'Performance of genetic programming optimised Bowtie2 on genome comparison and analytic testing (GCAT) benchmarks', *BioData Min.*, vol. 8, no. 1, p. 1, 2015.
- [107] Li H, Handsaker B, Wysoker A, Fennell T, Ruan J, Homer N, et al, 'The sequence alignment/map format and SAMtools', *Bioinformatics*, vol. 25, no. 16, pp. 2078–2079, 2009.
- [108] Anders S, Pyl PT, Huber W., 'HTSeq—a Python framework to work with high-throughput sequencing data', *Bioinformatics*, vol. 31, no. 2, pp. 166–169, 2015.
- [109] Love MI, Huber W, Anders S, 'Moderated estimation of fold change and dispersion for RNA-seq data with DESeq2', *Genome Biol.*, vol. 15, no. 12, p. 550, 2014.
- [110] Team RC, 'R: A language and environment for statistical computing', 2013.
- [111] Wickham H, 'ggplot2: elegant graphics for data analysis', vol. Springer, 2016.
- [112] Lolle SJ, Berlyn GP, Engstrom EM, Krolkowski KA, Reiter W-D, Pruitt RE, 'Developmental Regulation of Cell Interactions in the Arabidopsis fiddlehead-1 Mutant: A Role for the Epidermal Cell Wall and Cuticle', *Dev. Biol.*, vol. 189, pp. 311–321, 1997.
- [113] DeLano WL, 'Pymol: An open-source molecular graphics tool', *CCP4 Newsl. Protein Crystallogr.*, vol. 40, no. 1, pp. 82–92, 2002.



## Figures

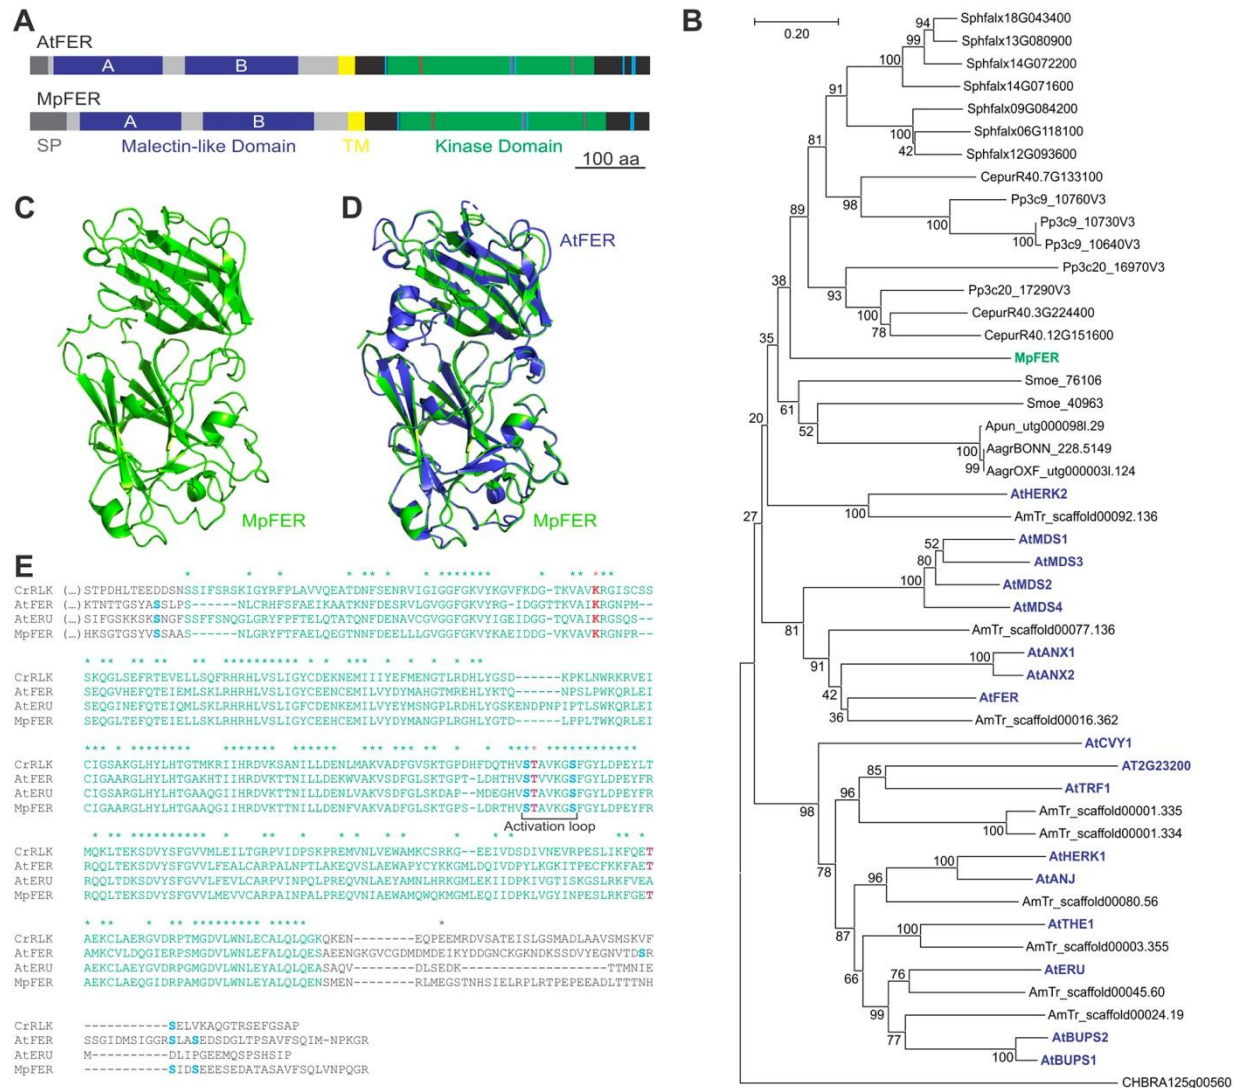

**Fig. 1. CrRLK1Ls Are Conserved among Land Plants**

(A) Representation of AtFER and MpFER proteins. The malectin domains are represented in blue and kinase domains in green. SP, signal peptide; TM, transmembrane domain (yellow). Amino acids important for regulation and activity are marked in red, violet, and light blue as described in Fig. 1E.

(B) A rooted neighbor-joining tree of the amino acid sequence of the predicted malectin-like domain (corresponding to aa 76-431 of MpFER). CrRLK1L members from *Marchantia polymorpha* (Mp, green), *Physcomitrium patens* (Pp), *Sphagnum fallax* (Sphfalx), *Ceratodon purpureus* (Cpur), *Anthoceros agrestis* Bonn (AagrBONN), *Anthoceros agrestis* Oxford (AagrOXR), *Anthoceros punctatus* (Apun), *Selaginella*

*moellendorffii* (Smo), *Amborella trichopoda* (AmTr), and *Arabidopsis thaliana* (At, blue) were used. The best hit from *Chara braunii* (CHBRA) was also included. The numbers indicate the bootstrap values (%) from 1000 replications. The given scale represents a substitution frequency of 0.1 amino acids per site.

(C) Cartoon representation of the predicted three-dimensional structure of the MpFER malectin-like domain, showing predicted alpha-helix and beta-sheet structures.

(D) Structural superposition of the malectin-like domains of AtFER (blue) and MpFER (green).

(E) Alignment of the cytoplasmic domains of MpFER, AtERU, AtFER, and CrRLK. Kinase domains are in green, putative phosphorylation sites in light blue (Ser) and violet (Thr), and the conserved catalytic Lys in red.

See also Fig. S1



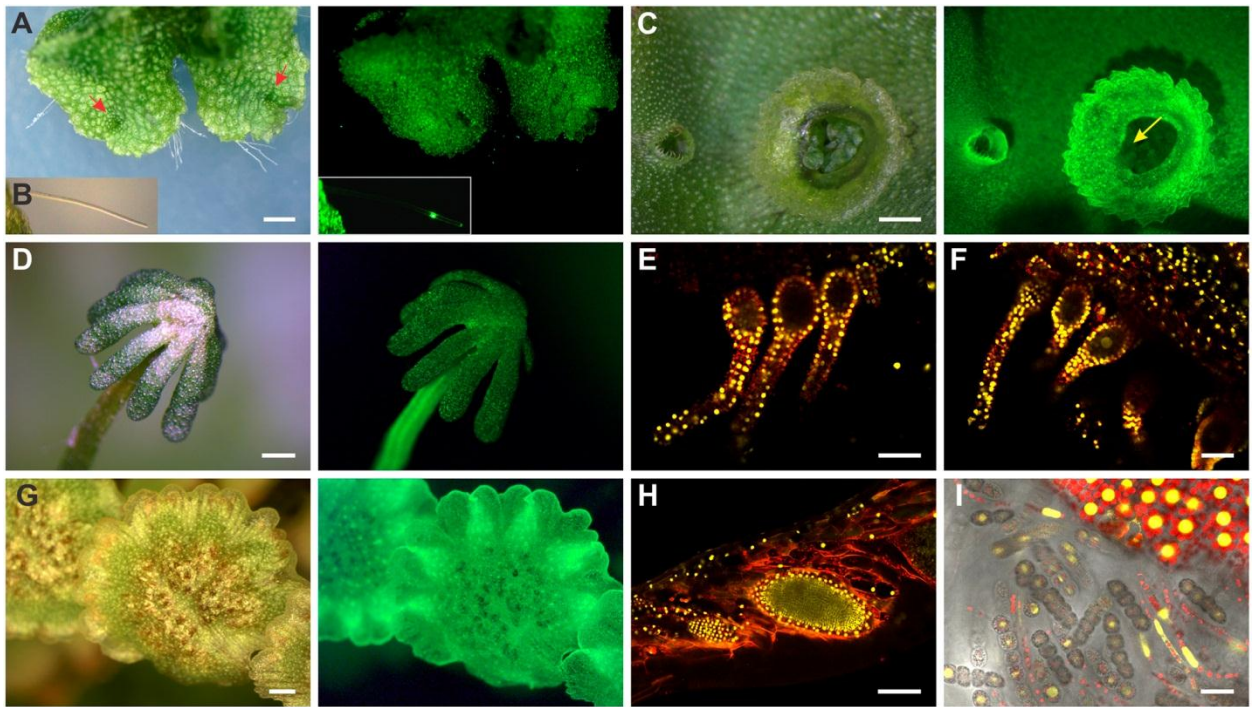

**Fig. 2. MpFER Is Broadly Expressed in most Tissues throughout the *M. polymorpha* Life Cycle**

Expression of *proMpFER:trpVNS* in different organs of male and female *M. polymorpha* plants. Fluorescence is visualized as either green (epifluorescence microscope) or yellow (confocal microscope) color, depending on the panel.

(A to D) Bright field (left) and epifluorescence (right) images of a thallus, (A) rhizoid (C), gemmae cups (C), and an archegoniophore (D). Red arrows indicate meristematic zones, the yellow arrow gemmae. Scale bars, 0.5 mm.

(E and F) Confocal images of archegonia before (E) and 2 days after fertilization (F). Scale bar, 50  $\mu$ m.

(G) Bright field (left) and epifluorescence (right) images of an antheridiophore. Scale bar, 1 mm.

(H) Confocal image of antheridia. Scale bar, 100  $\mu$ m.

(I) Confocal image of sporophyte and spores. Scale bar, 25 $\mu$ m.

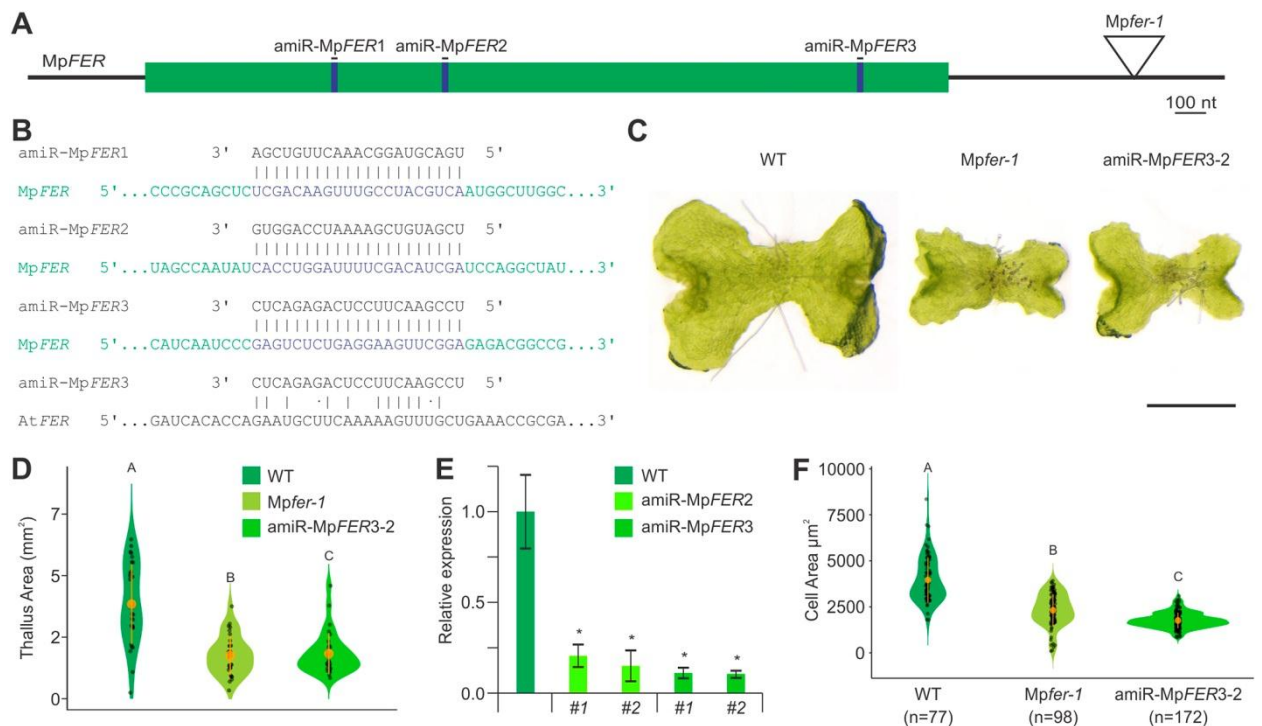

**Fig. 3. MpFER Controls Cell Size during Gametophyte Development**

(A) Representation of the mature MpFER mRNA. The coding sequence is in green, locations of the amiRNA target sites in blue. The location of the T-DNA insertion in Mpfer-1 is shown.

(B) Base complementarity of mature amiR-MpFER1, amiR-MpFER2, and amiR-MpFER3 with the MpFER transcript. Very low complementarity was found between amiR-MpFER3 and AtFER.

(C) Representative pictures of 10-day old gemmalings of wild-type (WT), Mpfer-1, and amiR-MpFER3-2 lines. Scale bar, 1 mm.

(D) Violin plot of thallus area of 14-day old gemmalings of WT, Mpfer-1, and amiR-MpFER3-2 lines. n = 30. Different letters indicate significant differences according to the non-parametric Kruskal-Wallis test and Dunn's test for multiple comparisons ( $P < 0.001$ ). Orange circles indicate the group mean and the corresponding vertical bars the standard deviation for each group.

(E) Relative expression level of MpFER in thallus tissue from WT and two independent insertion lines of amiR-MpFER2 and amiR-MpFER3, as measured by qRT-PCR. MpEF1 was used as internal control. Shown are means  $\pm$  standard errors of the means (SEM) of three biological replicates. Statistical analysis was performed by one-way analysis of variance (ANOVA) followed by a post-hoc Duncan test (\* $P < 0.01$ ).

(F) Violin plot of cell size in WT, *Mpfer-1*, and amiR-Mp*FER3-2* lines. Only areas with fully expanded cells in approximately 3-week old plants were used for measurements. Different letters indicate significant differences according to the non-parametric Kruskal-Wallis test and Dunn's test for multiple comparisons ( $P < 0.001$ ). Orange circles indicate the group mean and the corresponding vertical bars the standard deviation for each group.

See also Figs. S2,S3

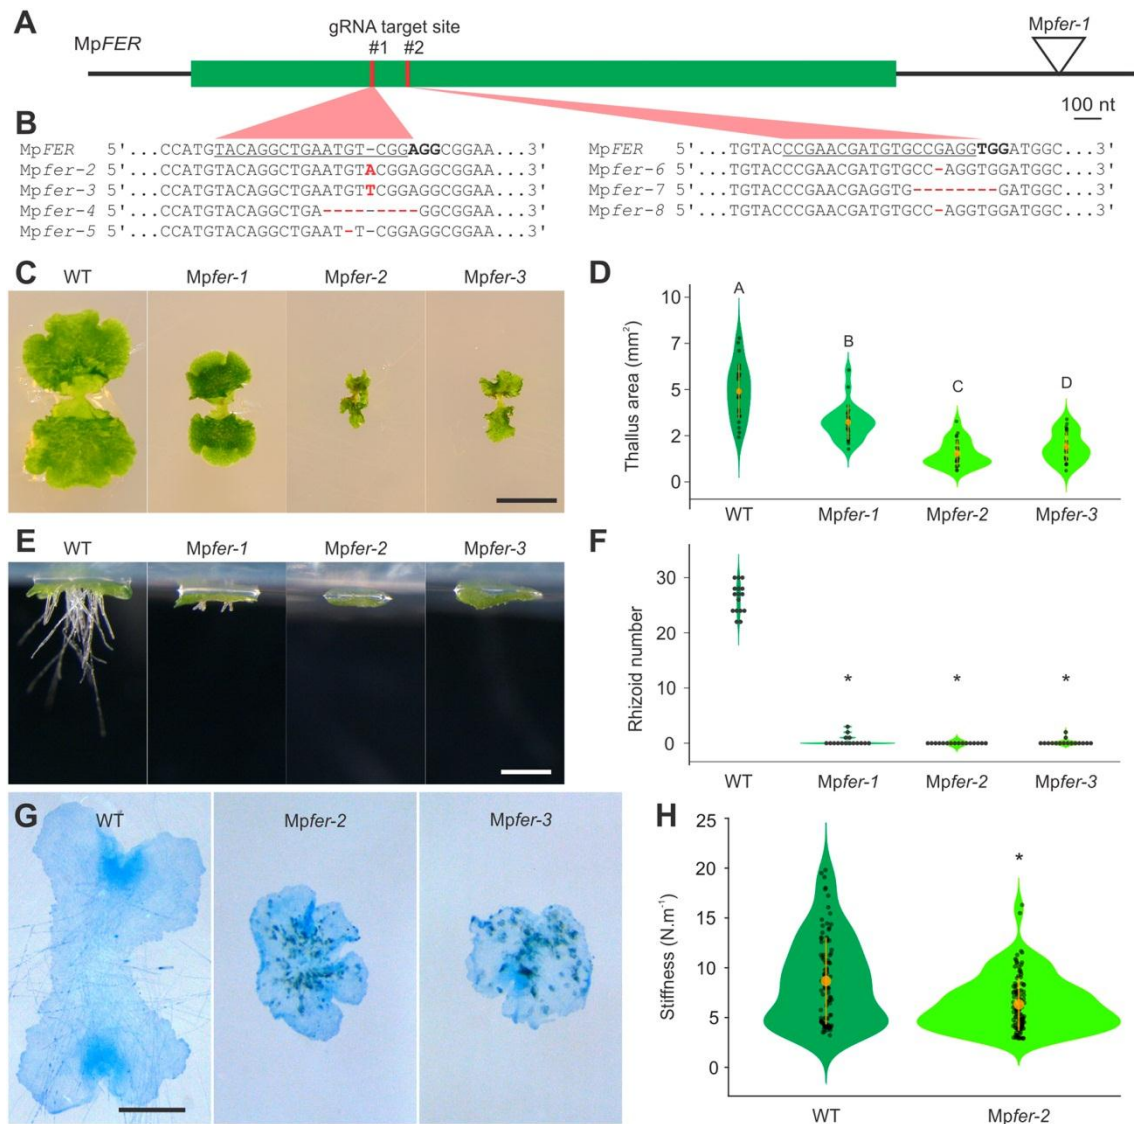

**Fig. 4. The Integrity of Thalli from *Mpfer* Knock-out Lines Is Severely Affected**

(A) Representation of the mature *MpFER* mRNA with the coding sequence in green, and the location of the gRNA target sites in red.

(B) Sequences of gRNA target sites in the confirmed *Mpfer* knock-out mutants. Deletions and insertions are highlighted in red.

(C) Representative pictures of 14-day old gemmalings of the wild type (WT), *Mpfer-1*, and two independent *Mpfer* knock-out mutants. Scale bar, 0.5 cm.

(D) Violin plot of thallus area of 14-day old gemmalings of WT, *Mpfer-1*, and two independent *Mpfer* knock-out mutants.  $n = 25$ . Different letters indicate significant differences in a one-way analysis of variance (ANOVA) follow by a post-hoc Duncan

test ( $P < 0.01$ ). Orange circles indicate the group mean and the corresponding vertical bars the standard deviation for each group.

(E) Representative pictures of 7-day old gemmalings growing in upside-down plates of WT, *Mpfer-1*, and two independent *Mpfer* knock-out mutants. Scale bar, 500  $\mu\text{m}$ .

(F) Violin plot of rhizoid number in 3-day old gemmalings of WT, *Mpfer-1*, and two independent *Mpfer* knock-out mutants.  $n = 16$ . Statistical analysis was performed by one-way analysis of variance (ANOVA) followed by a post-hoc Duncan test ( $*P < 0.01$ ).

(G) Trypan blue staining of 7-day old gemmalings of WT, *Mpfer-1*, and two independent *Mpfer* knock-out mutants. Scale bar, 1 mm.

(H) Violin plot of the reduction in the apparent stiffness of gemmaling tissue in *Mpfer-2* compared to the WT. Statistical analysis was performed using a Kruskal-Wallis test followed by a Tukey-Kramer post-hoc test ( $*P < 0.001$ ). Orange circles indicate the group mean and the corresponding vertical bars the standard deviation for each group.



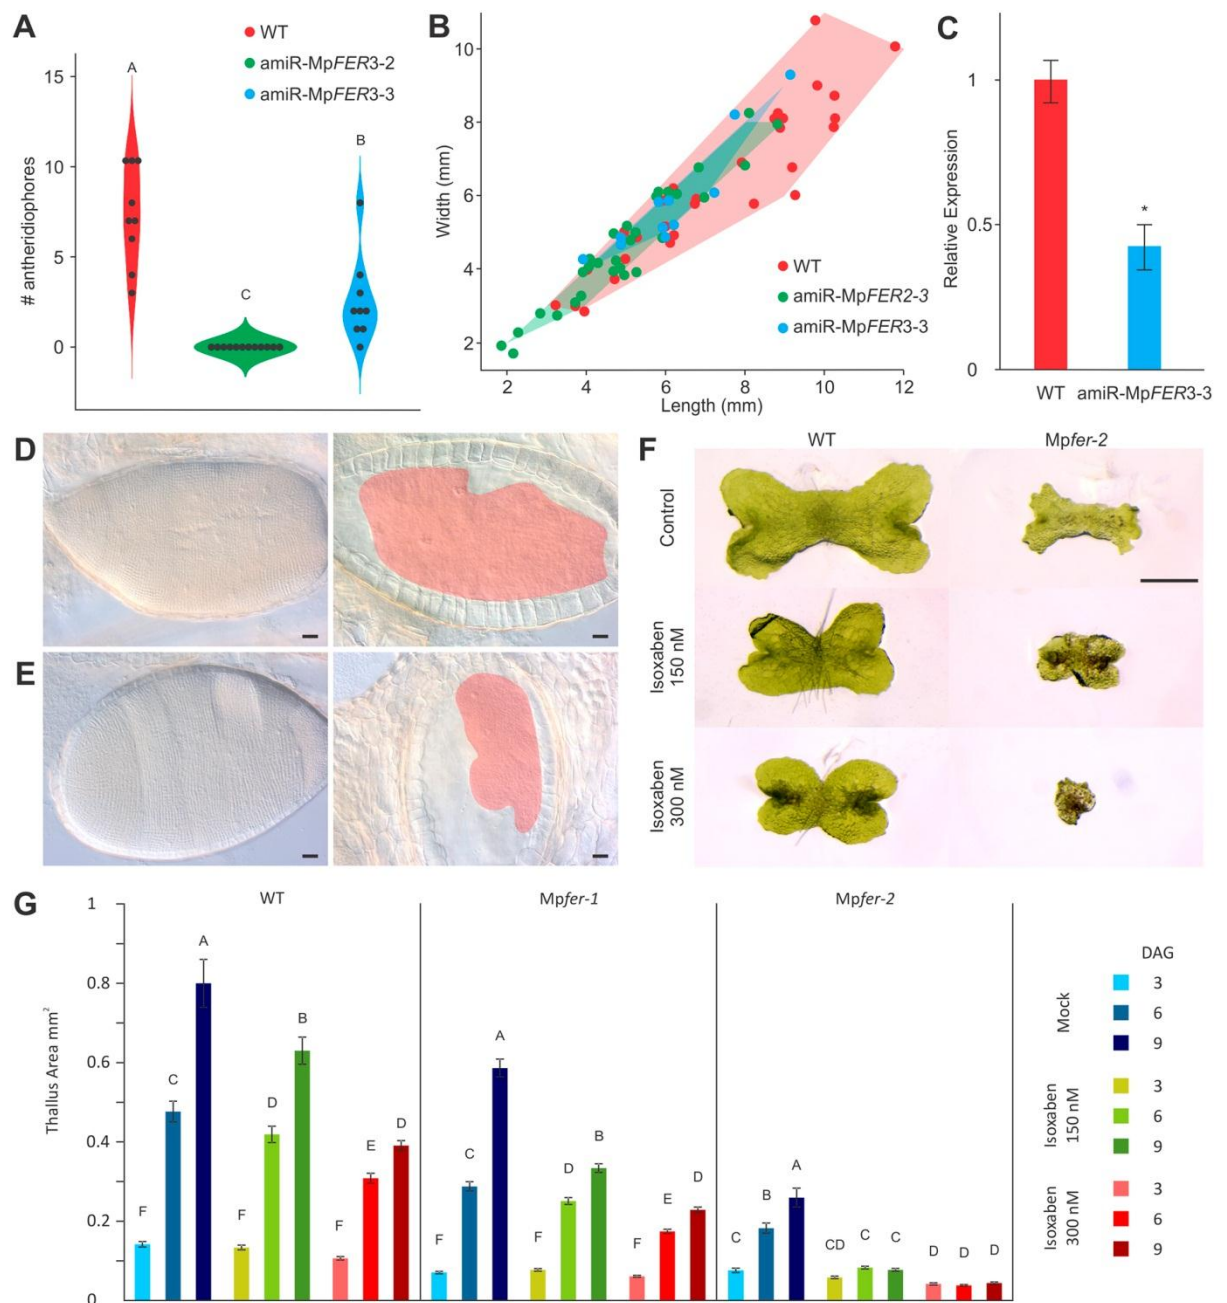

**Fig. 5. Conservation of *CrRLK1L* Function in Land Plants**

(A) Violin plot of the number of antheridiophores produced per plant for wild-type (WT,  $n=9$ ) and two independent amiR-MpFER3 lines (amiR-MpFER3-2,  $n = 9$ ; amiR-MpFER3-3,  $n = 12$ ). Different letters indicate a significant difference in a one-way analysis of variance (ANOVA) followed by a post-hoc Duncan test ( $P < 0.01$ ).

(B) Antheridiophore splash platform size distribution of WT ( $n = 32$ ), amiR-MpFER2-3 ( $n = 34$ ), and amiR-MpFER3-3 ( $n = 11$ ) lines. For all antheridia with a stalk  $>8$  mm, length and width of the platform were recorded.



(C) qRT-PCR of Mp*FER* levels in antheridiophores in a WT and amiR-Mp*FER3-3* line. Mp*EF1* was used as internal control. Shown are means  $\pm$  SEM of three biological replicates. Statistical analysis was performed by one-way analysis of variance (ANOVA) followed by a post-hoc Duncan test (\* $P < 0.01$ ).

(D and E) Mature antheridia of a WT (D) and amiR-Mp*FER3-3* line (E). Bright field images (left) and in cross-section (right). The spermatogenous areas are indicated in red. Scale bar, 100 $\mu$ m.

(F) Representative pictures of 6-day old gemmalings of WT and Mp*fer-2* mutants at different isoxaben concentrations. Scale bar, 1 mm.

(G) Thallus area of gemmalings of WT, Mp*fer-1*, and Mp*fer-2* lines growing on media containing different isoxaben concentrations.  $n = 35$ . Shown are means  $\pm$  SEM of two biological replicates. Different letters indicate a significant difference in a one-way analysis of variance (ANOVA) followed by a post-hoc Duncan test ( $P < 0.05$ ).

See also Fig. S3

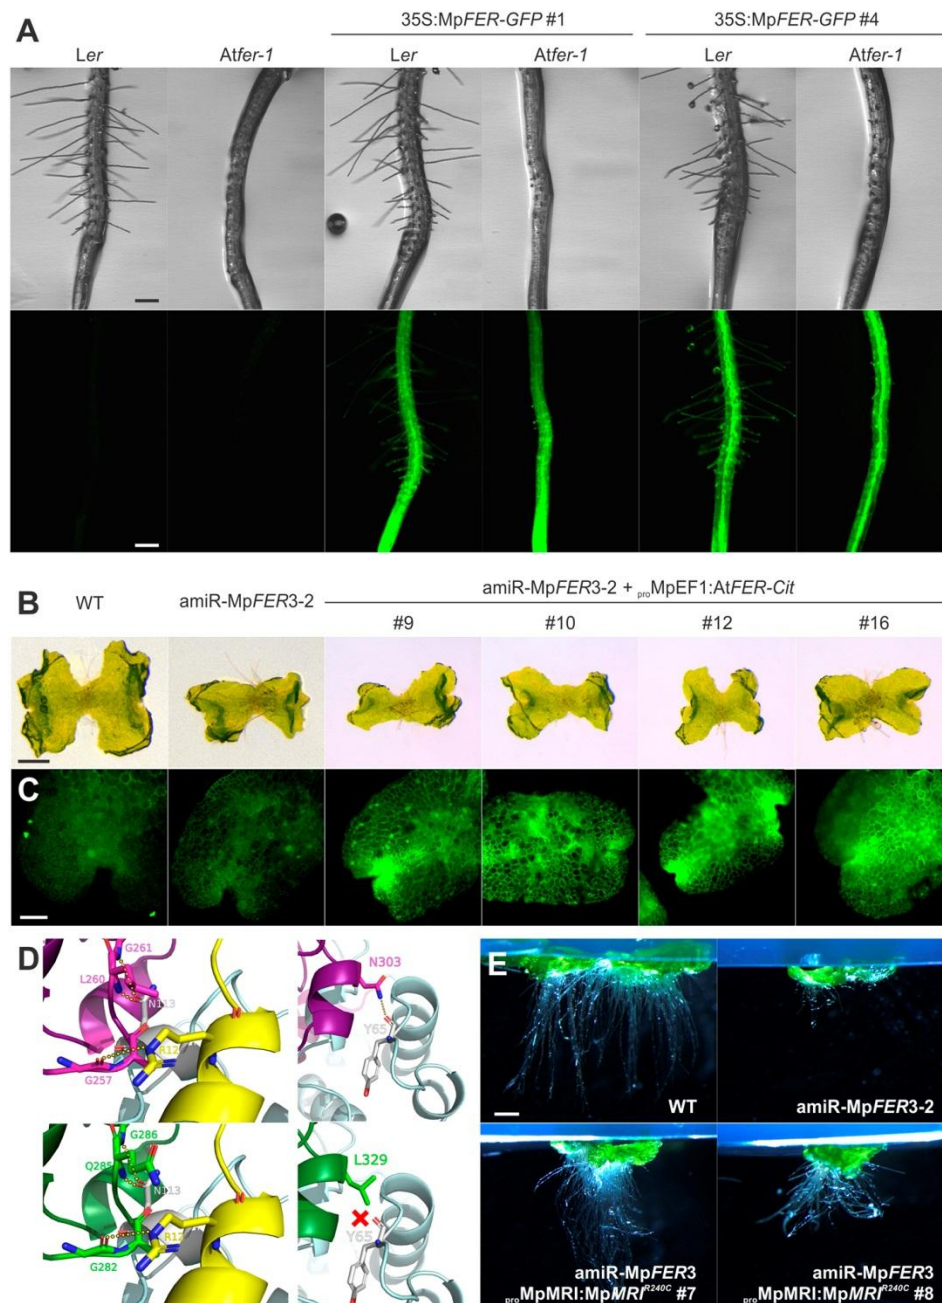

**Fig. 6. Interspecific Complementation of *A. thaliana* and *M. polymorpha* Plants with Reduced Levels of *FER* Activity**

(A) Roots of independent *A. thaliana* lines expressing 35S:MpFER-GFP in Ler wild-type (WT) and *Atfer-1* plants. Scale bar, 200  $\mu$ m.

(B) 10-day old gemmalings of WT and amiR-MpFER3-2 *M. polymorpha* plants with and without expression of AtFER-Cit. Scale bar, 0.5 mm.

(C) Citrine expression in 7-day old gemmalings of WT and amiR-MpFER3-2 plants with and without expression of AtFER-Cit. Scale bar, 100  $\mu$ m.

(D) Cartoon representation of the *CrRLK1L<sup>ECD</sup>* polar interactions sites with LRE/RALF when forming a protein complex. Upper panels correspond to contact areas between AtFER (purple), AtLLG2 (blue-grey), and AtRALF23 (yellow), and lower panels to the modeled MpFER structure (green) superimposed onto the same complex. Polar interactions are depicted as dotted yellow lines. Left panels show the predicted polar interactions of the complex that are conserved between *A. thaliana* and *M. polymorpha*, whereas the right panels show the polar interaction between AtFER and AtLLG2 that is predicted to be absent between MpFER and AtLLG2.

(E) Suppression of the amiR-Mp*FER* phenotype by a dominant-active version of Mp*MRI* under its own promoter (*proMpMRI:MRI<sup>R240C</sup>*). Scale bar, 1 mm.

See also Figs. S4-S6

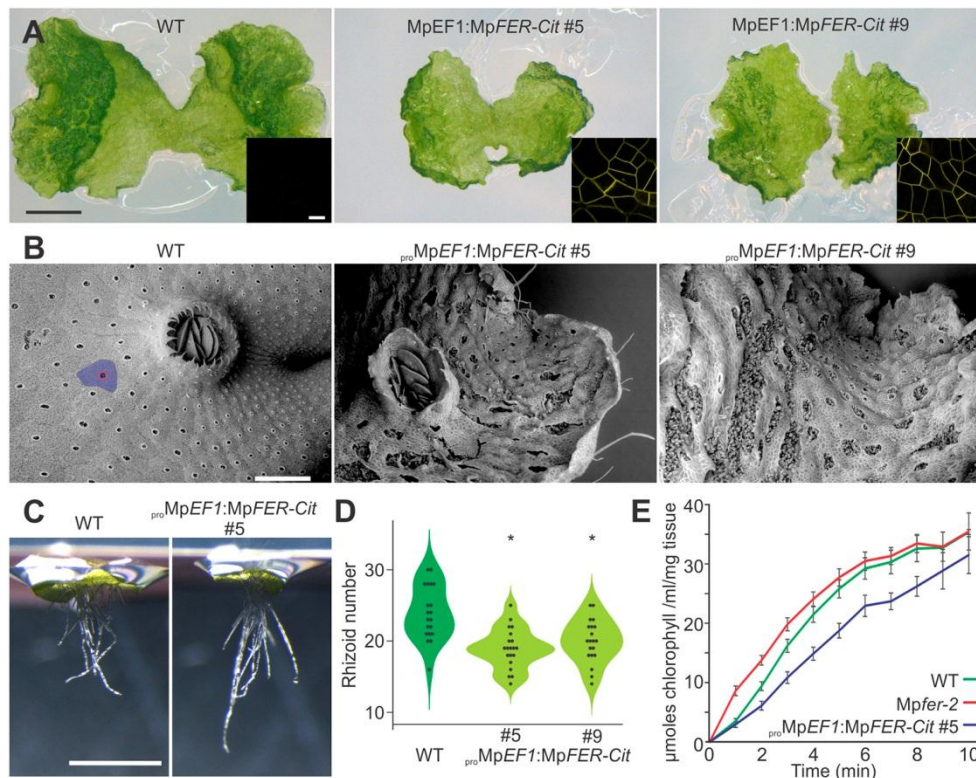

**Fig. 7. Overexpression of *MpFER* Affects Morphological Integrity**

(A) Representative pictures of 10-day old gemmalings of wild-type (WT) and two different lines overexpressing *MpFER* (*proMpEF1:MpFER-Cit*). Scale bar, 1 mm. Inset: Citrine expression at the plasma membrane in *proMpEF1:MpFER-Cit* lines #5 and #9 as observed under confocal microscopy. Scale bar, 20  $\mu$ m.

(B) Scanning electron microscopical images of thalli from 20-day old plants of WT and *proMpEF1:MpFER-Cit* lines #5 and #9. The blue region demarks an air chamber, while air pore cells are colored in red. Scale bar, 500  $\mu$ m.

(C) Representative pictures of 3-day old gemmalings growing in upside-down plates of WT and *proMpEF1:MpFER-Cit* #5 lines. Scale bar, 1 mm.

(D) Violin plot of the number of rhizoids in 3-day old gemmalings of WT and *proMpEF1:MpFER-Cit* lines #5 and #9.  $n = 20$ . Statistical analysis was performed by one-way analysis of variance (ANOVA) followed by a post-hoc Duncan test (\* $P < 0.01$ ).

(E) Graphs showing amount of effluxed chlorophyll as a function of time from 15-day old gemmalings of WT, *Mpfer-2* and *proMpEF1:MpFER-Cit* #5 lines.

See also Fig. S6

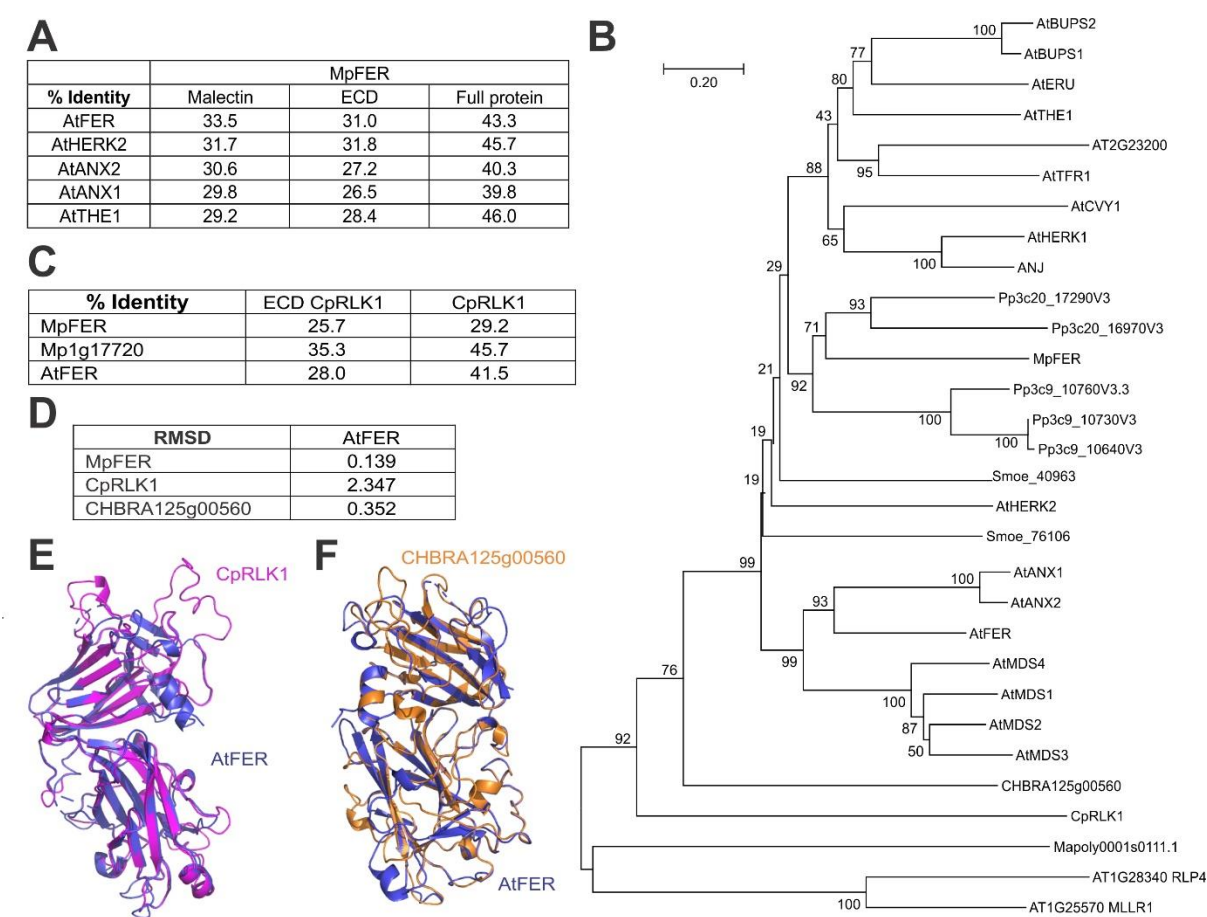

**Fig. S1. The CrRLK1L Family Appeared together with Land Plants. Related to Fig. 1.**

(A) Percentage of identity of the malectin-like domain, the complete ECD, and the full protein of MpFER with AtFER, AtHERK2, AtANX2, AtANX1, and AtTHE1.

(B) A rooted neighbour-joining tree of the amino acid sequence of the predicted malectin-like domains was generated using ClustalW. CrRLK1L members from *Marchantia polymorpha* (Mp), *Physcomitrium patens* (Pp), *Selaginella moellendorffii* (Smoe), and *Arabidopsis thaliana* (At) were used. Algal CpRLK1 and CHBRA125g00560, as well as Mp1g17720 (Mapoly001s0111) were also included. The numbers indicate the bootstrap values (%) from 1000 replications. The given scale represents a substitution frequency of 0.1 amino acids per site.

(C) Percentage of identity of the ECD and full protein of CpRLK1 with MpFER, AtFER, and Mp1g17720 (Mapoly001s0111).

(D) RMSD values for prediction of MpFER, CpRLK1, and CHBRA125g00560 3D structures of the ECD based on the AtFER ECD.

(E) Structural superposition of the ECD of AtFER (blue) and CpRLK1 (purple).

(F) Structural superposition of the ECD of AtFER (blue) and CHBRA125g00560 (orange) from *Chara brunii*.



**A** *MpmiR160* Mp1g26670  
 GCACCTCCTCTCTCCGACTGCAGCCCGTTTCGAGATCCGAGGACTTGCTCGACGCGACTAATTGGGGAGGCCAGACTG  
 CACT**TGCTTGGCTCCCTGTATGCCA**ACTGAGGAGCTCCTCAGAGACCTTGACAGGCTCCGTAGCTGGCATT**CAGGGGG**  
**CCATGCA**GGAGGAAGTCGCTACCTCCCGCAAGGTGCGACTAGCTTTCTGTCTTGGGTGCACACCTCACTGATGTTTGA  
 TAGATTACTTA

amiR-Mp*FER1*  
**TGCAAGCTT**GCACCTCCTCTCTCCGACTGCAGCCCGTTTCGAGATCCGAGGACTTGCTCGACGCGACTAATTGGGGAG  
 GCCAGACTGCACT**TGACGTAGGCAAACTTGTCTGA**ACTGAGGAGCTCCTCAGAGACCTTGACAGGCTCCGTAGCT**TCGAC**  
**ATGTTTGTCTACCTCAGGAGGAAGTCGCTACCTCCCGCAAGGTGCGACTAGCTTTCTGTCTTGGGTGCACACCTCACT**  
**GATGTTTGATAGATTACTTAGGATCCATA**

amiR-Mp*FER2*  
**TGCAAGCTT**GCACCTCCTCTCTCCGACTGCAGCCCGTTTCGAGATCCGAGGACTTGCTCGACGCGACTAATTGGGGAG  
 GCCAGACTGCACT**TCGATGTCTGAAAATCCAGGT**GACTGAGGAGCTCCTCAGAGACCTTGACAGGCTCCGTAGCC**ACCT**  
**GCATTTTTTGACAACGAGGAGGAAGTCGCTACCTCCCGCAAGGTGCGACTAGCTTTCTGTCTTGGGTGCACACCTCACT**  
**GATGTTTGATAGATTACTTAGGATCCATA**

amiR-Mp*FER3*  
**TGCAAGCTT**GCACCTCCTCTCTCCGACTGCAGCCCGTTTCGAGATCCGAGGACTTGCTCGACGCGACTAATTGGGGAG  
 GCCAGACTGCACT**TCGGAACCTTCTTCAGAGACT**CACTGAGGAGCTCCTCAGAGACCTTGACAGGCTCCGTAGC**GAGTC**  
**TGTGAGGGAGTTGGGAGGAGGAAGTCGCTACCTCCCGCAAGGTGCGACTAGCTTTCTGTCTTGGGTGCACACCTCACT**  
**GATGTTTGATAGATTACTTAGGATCCATA**

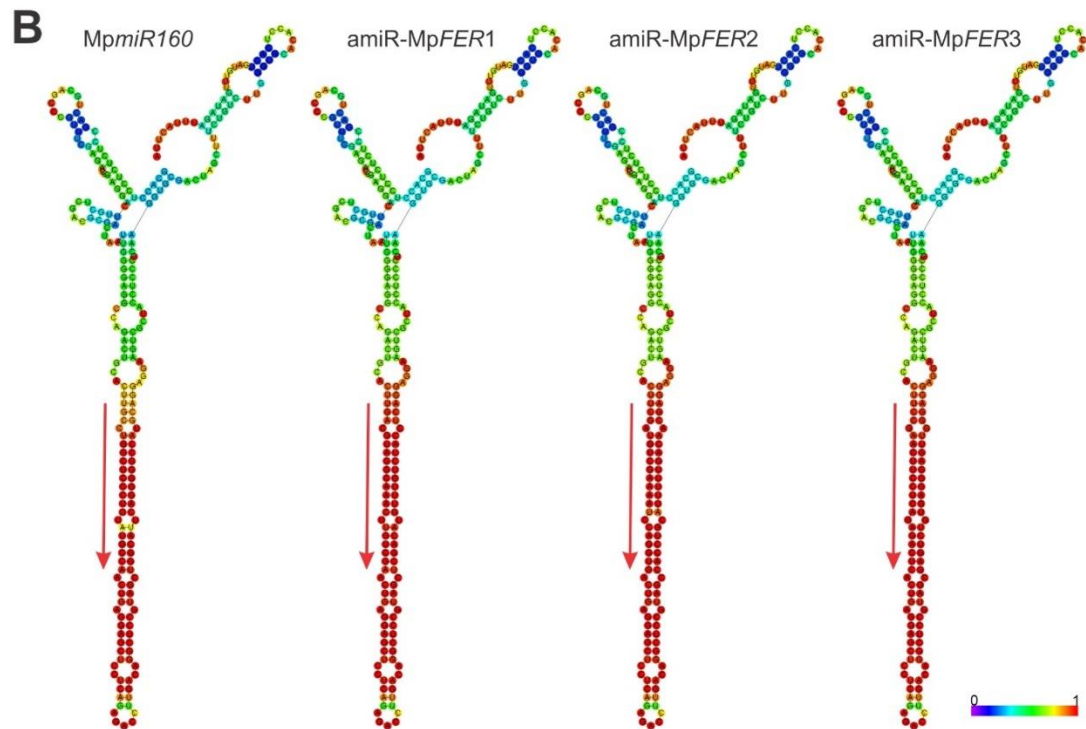

**Fig. S2. Design of amiR-Mp*FER* Precursors. Related to Fig. 3.**

(A) *MpmiR160* (Mapoly0002s0211, Mp1g26670) and amiR-Mp*FER1*, amiR-Mp*FER2*, and amiR-Mp*FER* sequences. miRNA sequences are in red and miRNA\* in blue. Cloning sequences from amiR-Mp*FER* constructs are in bold.

(B) Drawing of the minimum free energy structure of *MpmiR160* and amiR-Mp*FER3* constructs predicted by the RNAfold web server (<http://rna.tbi.univie.ac.at/cgi->

[bin/RNAWebSuite/RNAfold.cgi](#)). Red arrows indicate location and orientation of the mature miRNA in the precursor. The structures are coloured by base-pairing probabilities; for unpaired regions the colour denotes the probability of being unpaired.

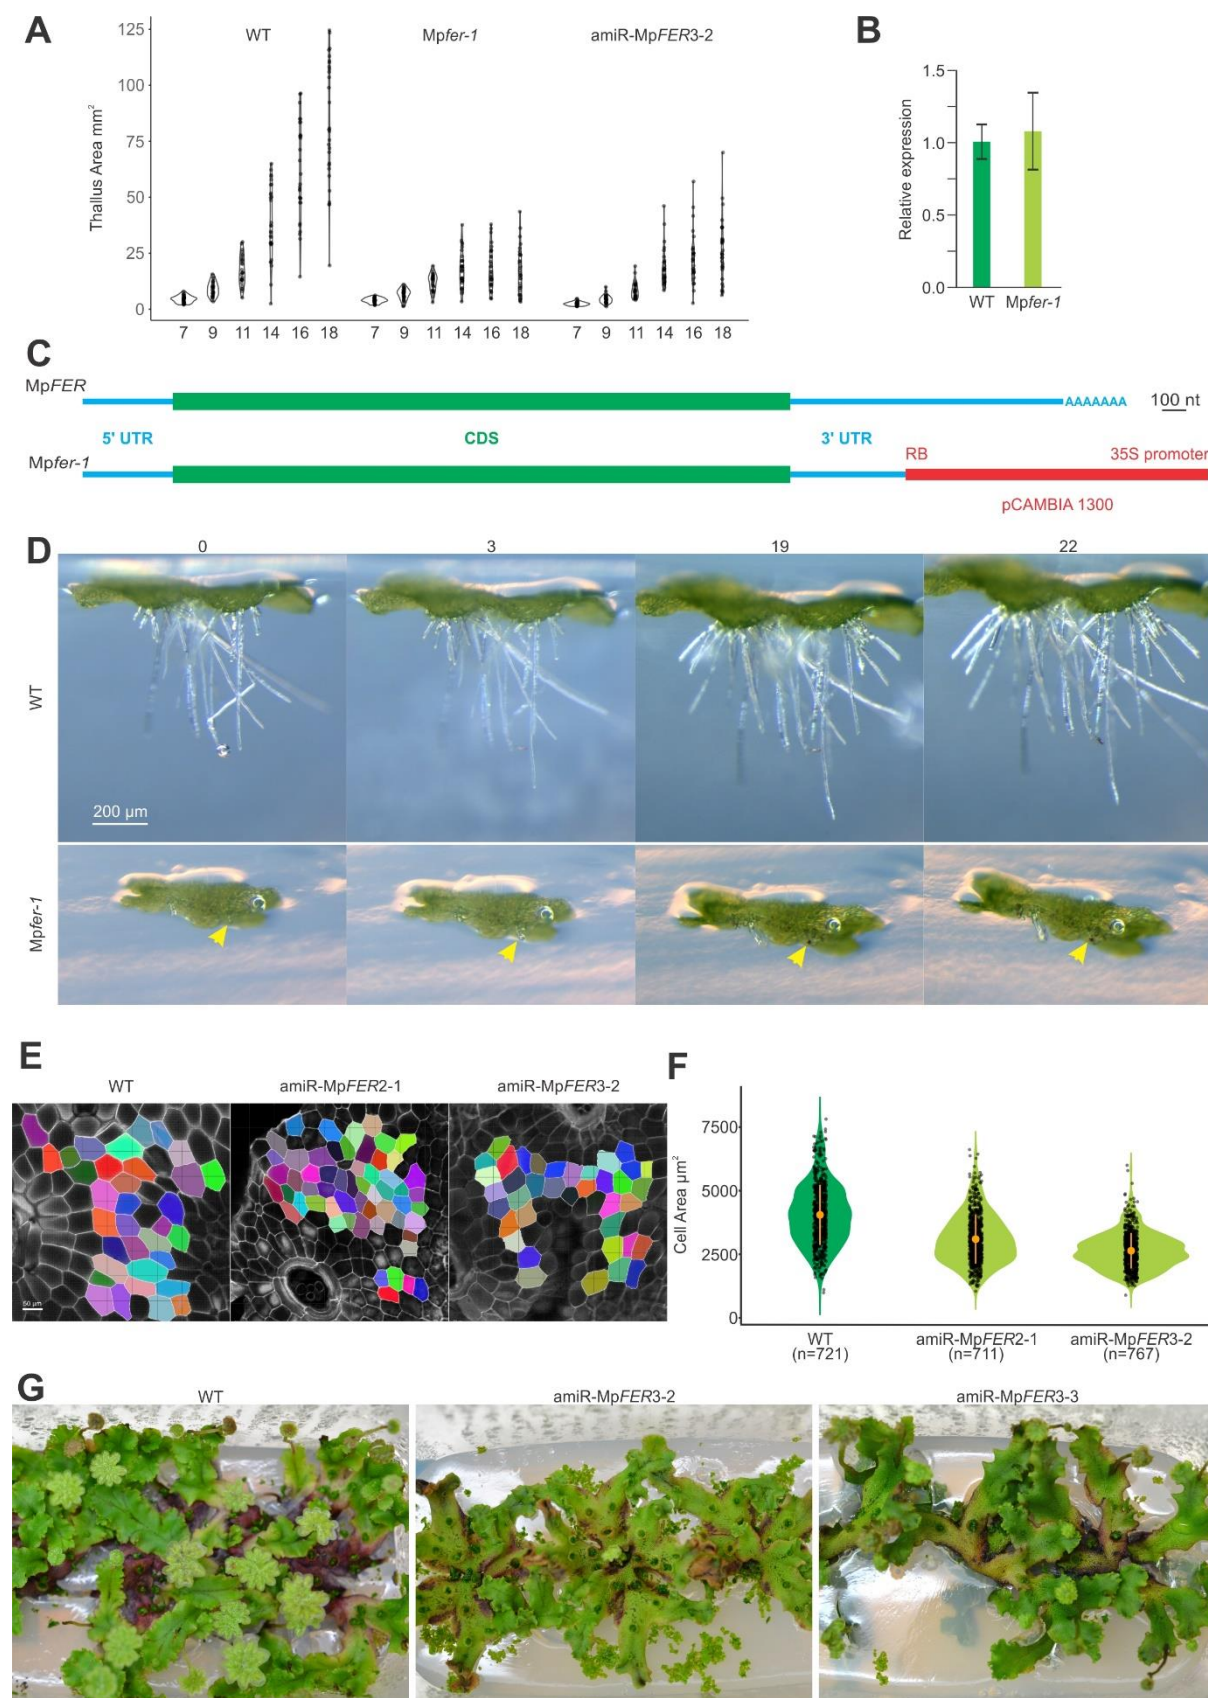

**Fig. S3. Reduction in Thallus and Cell Area in Plants with Reduced *MpFER* Levels. Related to Figs. 3 and 5.**

(A) Violin plot of thallus area of wild-type (WT), *Mpfer-1*, and *amiR-MpFER3-2* plants at different days after putting gemmae on plates.  $n = 30$ . Areas were estimated using ImageJ software.

(B) Relative expression level of *MpFER* in 14 day-old WT and *Mpfer-1* gemmalings, as measured by qRT-PCR. *MpEF1* was used as internal control. Shown are means  $\pm$  standard error of the mean (SEM) of three biological replicates. Statistical analysis was performed by a one-way analysis of variance (ANOVA) follow by a post-hoc Duncan test, no significant difference was observed.

(C) Schematic of *MpFER* transcripts in WT (upper) and *Mpfer-1* plants (lower).

(D) Pictures of growing rhizoids at different time points (in h). Yellow arrows indicate a growing rhizoid in *Mpfer-1* line that burst between 3 and 19 h.

(E) Representative images from cell surface areas measured in WT, *amiR-MpFER2-1*, and *amiR-MpFER3-2* plants. Scale bar, 50  $\mu\text{m}$ .

(F) Violin plot of cell areas of WT, *amiR-MpFER2-1*, and *amiR-MpFER3-2* plants. Difference is significant based on the nonparametric Kruskal-Wallis test and a linear regression model with a highly significant interaction ( $p < 0.001$ ). Orange circles indicate the group mean and the corresponding vertical bars the standard deviation for each group.

(G) Induction of antheridiophores in WT and two independent *amiR-MpFER3* lines. Three plants were grown in each sterile plastic box under far-red light induction.

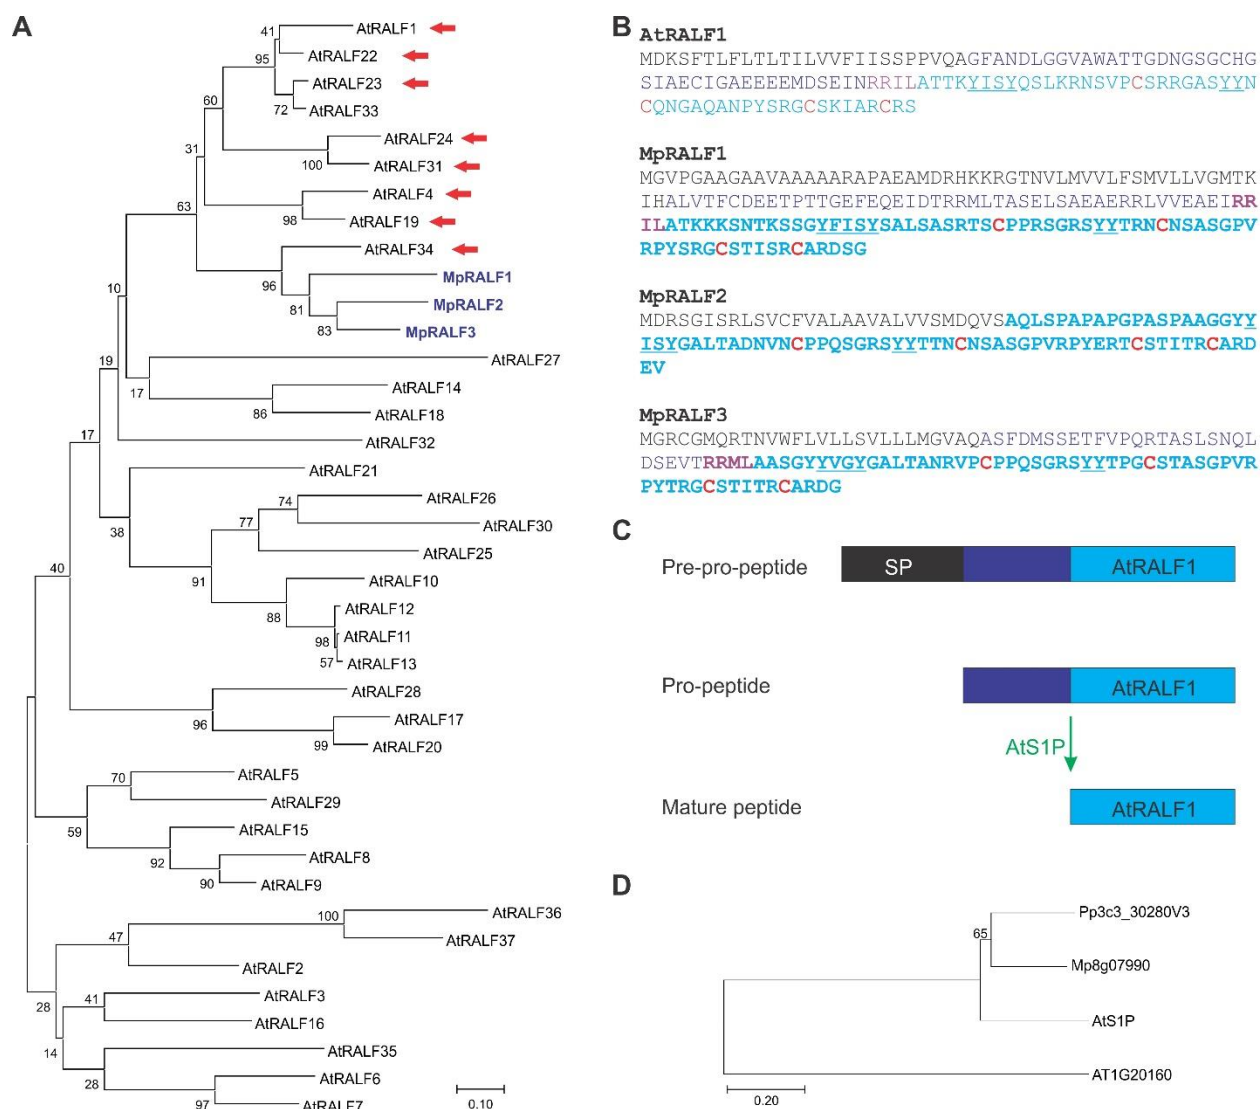

**Fig. S4. MpRALF Peptides Belong to the AtRALF1-clade of the RALF Family.**

**Related to Fig. 6.**

(A) A rooted neighbour-joining tree of the amino acid sequence of the predicted mature RALF peptides was generated using ClustalW. RALF members from *M. polymorpha* and *A. thaliana* were used. Red arrows indicate RALFs that are known ligands of CrRLK1Ls. The numbers indicate the bootstrap values (%) from 1000 replications. The given scale represents a substitution frequency of 0.1 amino acids per site.

(B) Amino acid sequence comparison of AtRALF1 and MpRALF1-3. Predicted signal peptides are in black, predicted mature peptides in light blue, conserved Cys in red, and predicted S1P recognition sites in violet.



(C) Processing pathway AtRALF1 by the S1P protease.

(D) A rooted neighbour-joining tree of the amino acid sequence of the S1P orthologs was generated using ClustalW. S1P members from *M. polymorpha*, *P. patens*, and *A. thaliana* were used. The numbers indicate the bootstrap values (%) from 1000 replications. The given scale represents a substitution frequency of 0.1 amino acids per site.



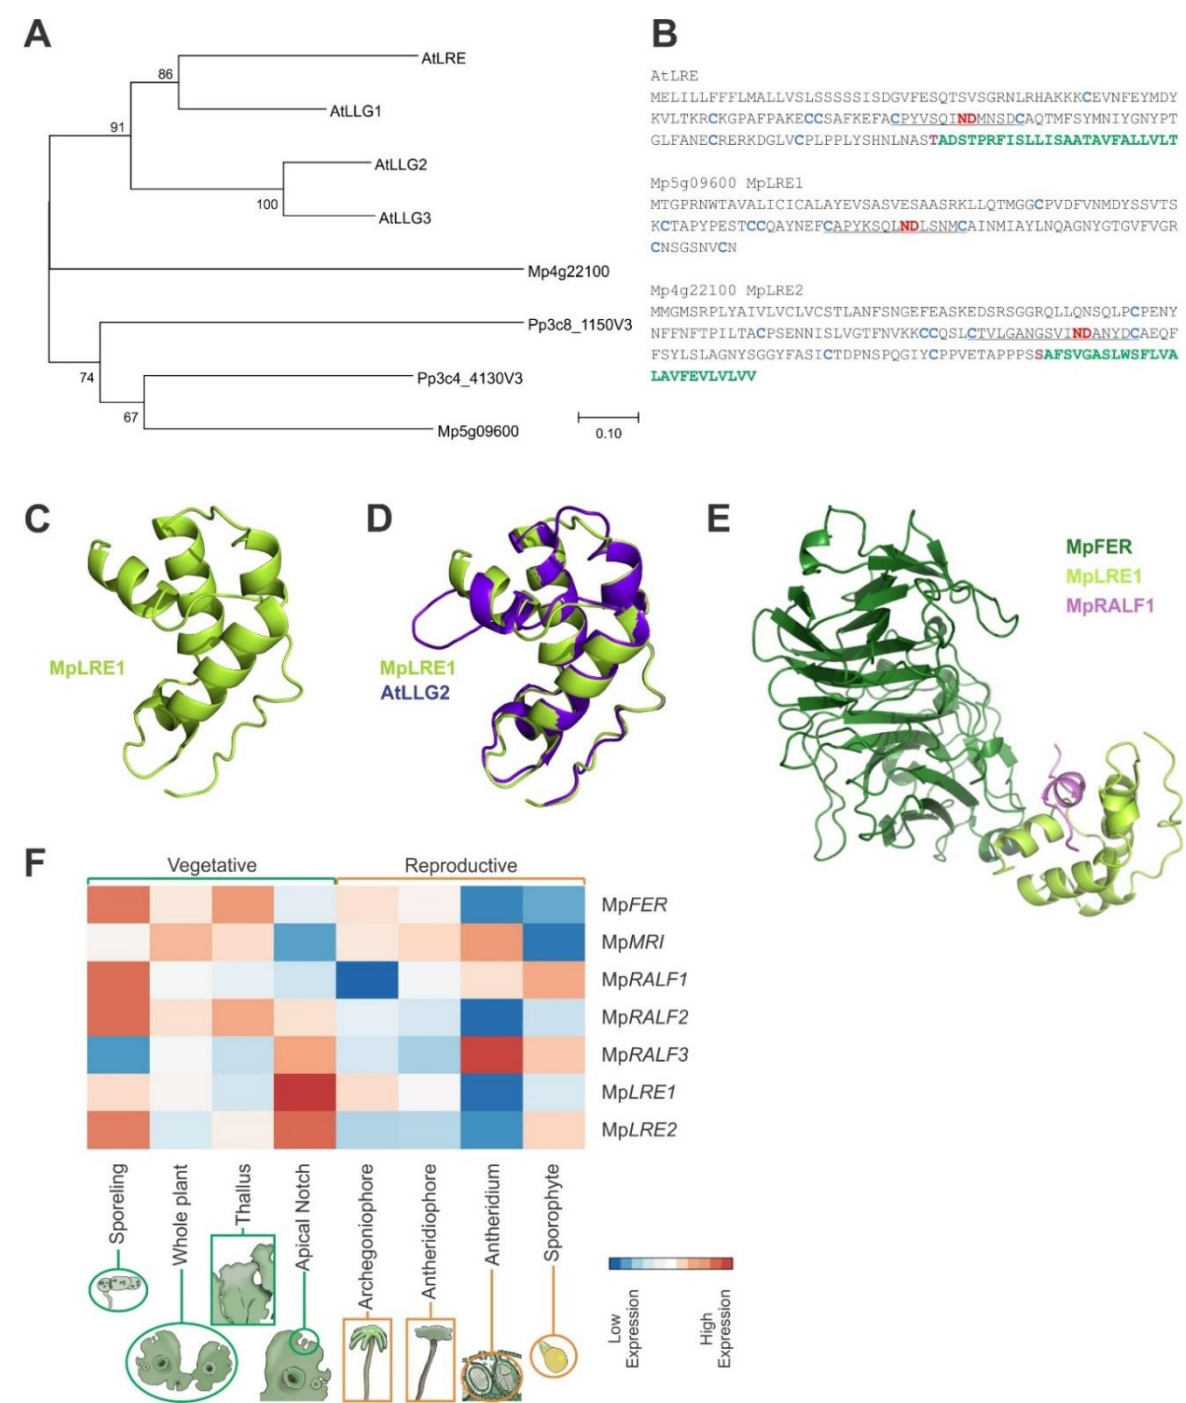

**Fig. S5. Two LORELEI-like Proteins Are Encoded in the *M. polymorpha* Genome. Related to Fig. 6.**

(A) A rooted neighbor-joining tree of the amino acid sequence of LRE orthologs was generated using ClustalW. LRE members from *M. polymorpha*, *P. patens*, and *A.*

*thaliana* were used. The numbers indicate the bootstrap values (%) from 1000 replications. The given scale represents a substitution frequency of 0.1 amino acids per site.

(B) Amino acid sequence of AtLRE, MpLRE1, and MpLRE2. Conserved Cys are in light blue, the ND motif in red, and the GPI-anchoring site in green.

(C) Cartoon representation of the predicted 3-dimensional structure of MpLRE1, showing predicted alpha-helices.

(D) Structural superposition of AtLGG2 (blue) and MpLRE1 (green).

(E) Cartoon representation of the predicted 3-dimensional structure of the MpFER/MpLRE1/MpRALF1 complex, showing predicted alpha-helices and beta-sheets.

(F) Heatmap depicting relative gene expression based on RNAseq data (row-Z-score of vs normalized counts) of MpFER and the *M. polymorpha* orthologs of AtMRI, AtRALF1, and AtLRE across different tissues. Vegetative and reproductive tissues are grouped by green and orange, respectively. Averaged expression values are represented with colours of increasing red and blue intensity indicating upregulation and downregulation of gene expression, respectively.

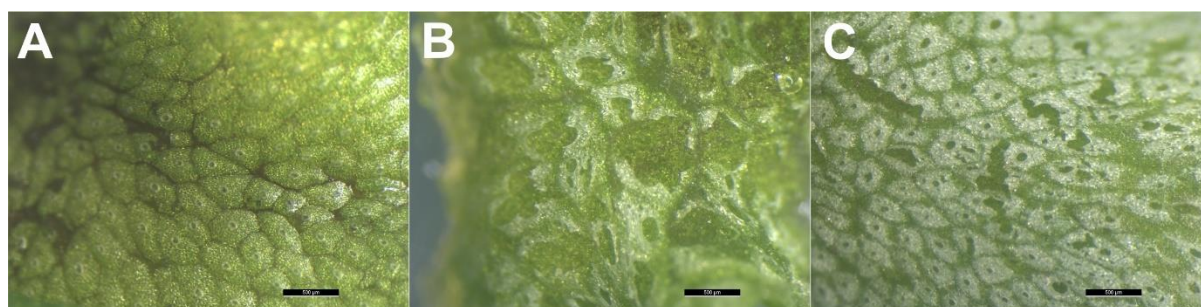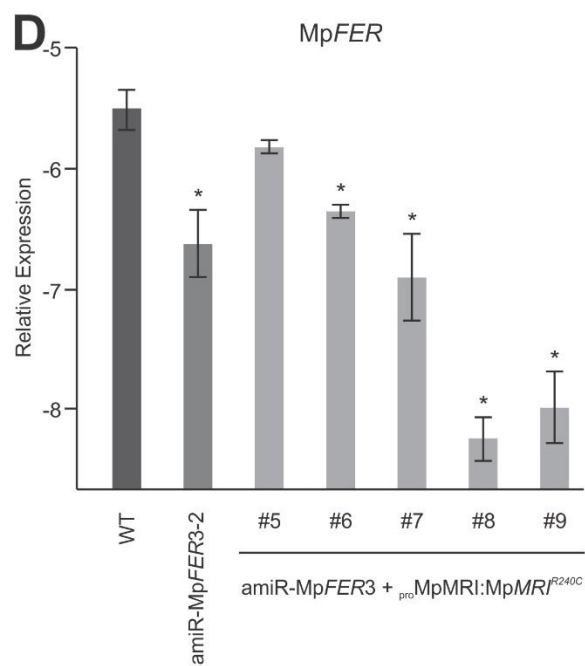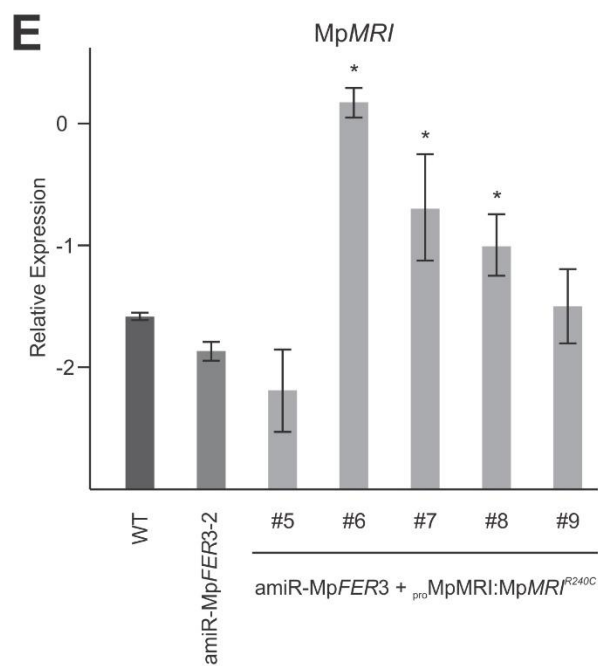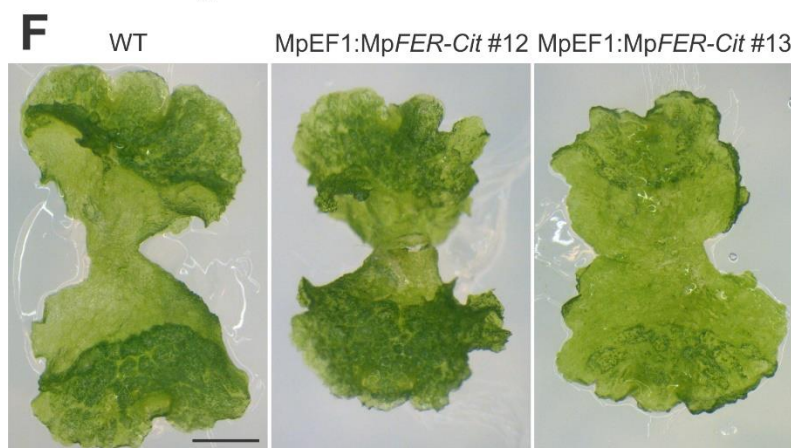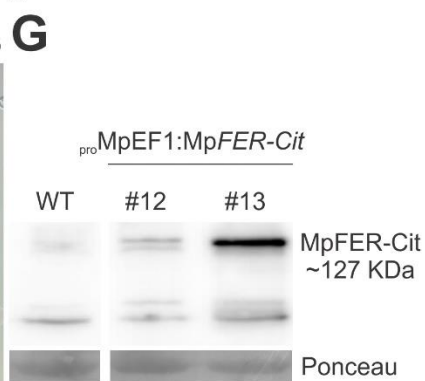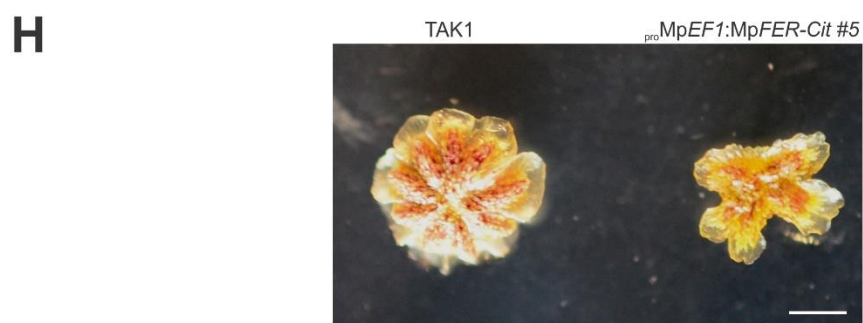

**Fig. S6. Expression of *MpMRI*<sup>R240C</sup> Suppresses the Bursted Rhizoid Phenotype of *amiR-MpFER3* Lines but Leads to Aberrant Epidermis Development. Related to Figs. 6,7.**

(A to C) Epidemical pictures of thalli from the wild-type (WT) (A), and *amiR-MpFER3* + *proMpMRI:MpMRI*<sup>R240C</sup> lines #6 (B) and #8 (C), which both partially suppressed the bursting rhizoid phenotype (Fig. 6).

(D and E) Relative expression of *MpFER* (D) and *MpMRI* (E) against the geometric mean of the reference genes *MpACT1*, *MpACT7*, and *MpAPT3* in WT, *amiR-MpFER3*-2, and 5 lines (#5 to #9) co-transformed with the *amiR-MpFER3*-2 and *proMpMRI:MpMRI*<sup>R240C</sup> constructs. Expression levels of three biological replicates were assessed by droplet digital PCR (ddPCR). The y-axis corresponds to the log<sub>2</sub>-ratio between the test and the geometric mean of the reference genes. Shown are means ± SEMs of three biological replicates. Statistical analysis was performed by one-way analysis of variance (ANOVA) followed by a post-hoc Duncan test (\*P < 0.01).

(F) Representative pictures of 10-day old gemmalings of wild-type (WT) and two different lines overexpressing *MpFER* (*proMpEF1:MpFER-Cit*). Scale bar, 1 mm.

(G) Western blot analysis of *proMpEF1:MpFER-Cit* lines from Fig. S6A using an anti-GFP antibody. WT lines were used as negative controls. The Ponceau membrane staining of the most intense band at 55 kDa (presumably Rubisco) was used as a loading control.

(H) Representative images of the antheridial receptacle of WT and *proMpEF1:MpFER-Cit* plants. Scale bar, 2 mm.

**Table S1. Primer sequences used for qRT-PCR, ddPCR, and 3' RACE-PCR**

| Name           | Sequence                   |
|----------------|----------------------------|
| Mp <i>FER</i>  | CGAGGAGCATTGCGAGATG        |
| Mp <i>FER</i>  | AGGTCGGTGCCGTAGAGATG       |
| Mp <i>EF1α</i> | AGGTTGTCACCATGGGAAAGGAGA   |
| Mp <i>EF1α</i> | TCACACGCTTGTCAATACCTCCCA   |
| Mp <i>MRI</i>  | TGGCAGCTCGTCTCCACTCT       |
| Mp <i>MRI</i>  | AGTCATGGCGTACTCGGGTG       |
| Mp <i>ACT7</i> | AGGCATCTGGTATCCACGAG       |
| Mp <i>ACT7</i> | ACATGGTCGTTCTCCAGAC        |
| Mp <i>ACT1</i> | GAGCGCGGTTACTCTTTCAC       |
| Mp <i>ACT1</i> | GACCGTCAGGAAGCTCGTAG       |
| Mp <i>APT3</i> | CGACATGGACGGCCTGGAGCTGGAG  |
| Mp <i>APT3</i> | CGAAAGCCCAAGAAGCTACC       |
| Mp <i>APT3</i> | GTACCCCCGGTTGCAATAAG       |
| 3'RACE-Fwd1    | AACGGTG GTTGGATGGTTCGATTAG |
| 3'RACE-Fwd2    |                            |
| Oligo(dC)      | CCCCCCCCCCCCCCCCCVN        |

**Table S2. List of primers used for cloning**

| Name               | Target        | Sequence                                                   |
|--------------------|---------------|------------------------------------------------------------|
| proMp <i>FER</i> F | Mp <i>FER</i> | TAGTTGGAATGGGTTTCAATGCTGTGACCACTGACTTC                     |
| proMp <i>FER</i> R | Mp <i>FER</i> | TTATGGAGTTGGGTTTCAAGTAGTGTATCCTCCAGCCGCTTT                 |
| Mp <i>FER</i> F    | Mp <i>FER</i> | GGGGACAAGTTTGTACAAAAAGCAGGCT-<br>AGAGCCCAAGGAGGAAGGGCGACCA |
| Mp <i>FER</i> R    | Mp <i>FER</i> | GGGGACCACTTTGTACAGAAAGCTGGGTT-<br>CCTTCCTTGAGGGTTCACCAGCTG |



**Table S3. List of publicly available RNA-seq samples downloaded from SRA and used in this study.** Sample list of publicly available RNA-seq samples that were used in this study.

The table also includes the tissue classification in which every sample was grouped with, their corresponding phase (vegetative vs sexual), and the genotype they correspond to. BC = Back Crossed to TAK1 genotype followed by the number of back crosses.

| SRR_ID     | SRX_ID    | Organism        | Tissue Group    | Phase      | Strain       |
|------------|-----------|-----------------|-----------------|------------|--------------|
| SRR896228  | SRX301558 | M.Polymorpha;WT | Thallus         | Vegetative | Tak1         |
| SRR896225  | SRX301555 | M.Polymorpha;WT | Archegoniophore | Sexual     | Tak2BC4      |
| SRR896226  | SRX301560 | M.Polymorpha;WT | Thallus         | Vegetative | Tak1         |
| SRR896229  | SRX301557 | M.Polymorpha;WT | Thallus         | Vegetative | Tak1         |
| SRR896224  | SRX301559 | M.Polymorpha;WT | Sporeling       | Vegetative | Tak1xTak2BC4 |
| SRR896230  | SRX301553 | M.Polymorpha;WT | Antheridiophore | Sexual     | Tak1         |
| SRR896227  | SRX301554 | M.Polymorpha;WT | Thallus         | Vegetative | Tak1xTak2BC4 |
| SRR896223  | SRX301556 | M.Polymorpha;WT | Sporophyte      | Sexual     | Tak1xTak2BC4 |
| SRR971246  | SRX346276 | M.Polymorpha;WT | Archegoniophore | Sexual     | Tak2         |
| SRR971244  | SRX346274 | M.Polymorpha;WT | Thallus         | Vegetative | Tak2         |
| SRR971248  | SRX346277 | M.Polymorpha;WT | Antheridiophore | Sexual     | Tak1         |
| SRR971249  | SRX346278 | M.Polymorpha;WT | Archegoniophore | Sexual     | Tak2         |
| SRR971243  | SRX346272 | M.Polymorpha;WT | Thallus         | Vegetative | Tak1         |
| SRR971245  | SRX346275 | M.Polymorpha;WT | Antheridiophore | Sexual     | Tak1         |
| SRR1553299 | SRX682817 | M.Polymorpha;WT | Sporophyte      | Sexual     | Tak1xTak2    |
| SRR1552617 | SRX682160 | M.Polymorpha;WT | Whole_Plant     | Vegetative | Tak1xTak2    |
| SRR1553294 | SRX682811 | M.Polymorpha;WT | Apical_Notch    | Vegetative | Tak1xTak2    |
| SRR1553297 | SRX682815 | M.Polymorpha;WT | Sporophyte      | Sexual     | Tak1xTak2    |
| SRR1553296 | SRX682814 | M.Polymorpha;WT | Apical_Notch    | Vegetative | Tak1xTak2    |
| SRR1553276 | SRX682793 | M.Polymorpha;WT | Whole_Plant     | Vegetative | Tak1xTak2    |
| SRR1553295 | SRX682813 | M.Polymorpha;WT | Apical_Notch    | Vegetative | Tak1xTak2    |
| SRR1553298 | SRX682816 | M.Polymorpha;WT | Sporophyte      | Sexual     | Tak1xTak2    |
| DRR050343  | DRX045349 | M.Polymorpha;WT | Whole_Plant     | Vegetative | Tak1xTak2    |
| DRR050346  | DRX045352 | M.Polymorpha;WT | Antheridiophore | Sexual     | Tak1xTak2    |
| DRR050347  | DRX045353 | M.Polymorpha;WT | Antheridiophore | Sexual     | Tak1xTak2    |
| DRR050348  | DRX045354 | M.Polymorpha;WT | Antheridiophore | Sexual     | Tak1xTak2    |
| DRR050353  | DRX045359 | M.Polymorpha;WT | Archegoniophore | Sexual     | Tak1xTak2    |
| DRR050344  | DRX045350 | M.Polymorpha;WT | Whole_Plant     | Vegetative | Tak1xTak2    |
| DRR050351  | DRX045357 | M.Polymorpha;WT | Archegoniophore | Sexual     | Tak1xTak2    |
| DRR050349  | DRX045355 | M.Polymorpha;WT | Antheridium     | Sexual     | Tak1xTak2    |
| DRR050352  | DRX045358 | M.Polymorpha;WT | Archegoniophore | Sexual     | Tak1xTak2    |
| DRR050345  | DRX045351 | M.Polymorpha;WT | Whole_Plant     | Vegetative | Tak1xTak2    |
| DRR050350  | DRX045356 | M.Polymorpha;WT | Antheridium     | Sexual     | Tak1xTak2    |
| DRR118950  | DRX111959 | M.Polymorpha;WT | Whole_Plant     | Vegetative | Tak1         |
| DRR118945  | DRX111954 | M.Polymorpha;WT | Whole_Plant     | Vegetative | Tak2BC3      |
| DRR118951  | DRX111960 | M.Polymorpha;WT | Whole_Plant     | Vegetative | Tak1         |
| DRR118943  | DRX111952 | M.Polymorpha;WT | Whole_Plant     | Vegetative | Tak2BC3      |
| DRR118944  | DRX111953 | M.Polymorpha;WT | Whole_Plant     | Vegetative | Tak2BC3      |
| DRR118949  | DRX111958 | M.Polymorpha;WT | Whole_Plant     | Vegetative | Tak1         |



**Table S4. Quality estimation values generated during the modelling processes.** For each target protein, several templates were considered for model comparison and validation. General Model Quality Estimate (GMQE) score and the QMEAN DisCo score are generated by SWISS-MODEL web server [60]: higher values indicate better accuracy in model prediction. RMSD stands for root-mean-square deviation and measures the average distance between the atoms of paired superimposed proteins, thus, the lower the values, the more similar is the modelled protein to the template.

| Template Gene | Target Gene    | Template PDB | GMQE | QMEAN DisCo | RMSD  |
|---------------|----------------|--------------|------|-------------|-------|
| <b>AtFER</b>  | MpFER          | 6a5b.1.A     | 0.66 | 0.71 ± 0.05 | 0.139 |
| <b>AtANX1</b> | MpFER          | 6fig.1.A     | 0.64 | 0.68 ± 0.05 | 0.144 |
| <b>AtANX2</b> | MpFER          | 6fih.1.A     | 0.58 | 0.62 ± 0.05 | 0.104 |
|               |                |              |      |             |       |
| <b>AtLLG1</b> | MpLRE1         | 6a5d.2.A     | 0.52 | 0.70 ± 0.10 | 0.11  |
| <b>AtLLG2</b> | MpLRE1         | 6a5e.1.B     | 0.45 | 0.63 ± 0.11 | 0.14  |
| <b>AtLLG1</b> | MpLRE2         | 6a5d.2.A     | 0.44 | 0.67 ± 0.05 | 0.15  |
| <b>AtLLG2</b> | MpLRE2         | 6a5e.1.B     | 0.34 | 0.57 ± 0.09 | 0.18  |
|               |                |              |      |             |       |
| <b>AtFER</b>  | CpRLK1         | 6a5b.1.A     | 0.45 | 0.51 ± 0.05 | 2.347 |
| <b>AtANX1</b> | CpRLK1         | 6fig.1.A     | 0.48 | 0.52 ± 0.05 | 3.038 |
| <b>AtANX2</b> | CpRLK1         | 6fih.1.A     | 0.49 | 0.52 ± 0.05 | 1.721 |
|               |                |              |      |             |       |
| <b>AtFER</b>  | CHBRA125g00560 | 6a5b.1.A     | 0.58 | 0.61 ± 0.05 | 0.352 |
| <b>AtANX1</b> | CHBRA125g00560 | 6fig.1.A     | 0.59 | 0.59 ± 0.05 | 0.41  |
| <b>AtANX2</b> | CHBRA125g00560 | 6fih.1.A     | 0.59 | 0.59 ± 0.05 | 0.481 |
